# Supplementary material
Source: PubMed Central journal article supplement (PMC9583461)
Supplement: 12879_2022_7774_MOESM1_ESM.pdf [file 12879_2022_7774_MOESM1_ESM.pdf]

| Patient         | Mapped Reads | Filtered Reads | Target Reads | Mean Depth | Uniformity |
|-----------------|--------------|----------------|--------------|------------|------------|
| Patient1_030621 | 540222       | 0.03%          | 99.15%       | 2464       | 87.04%     |
| Patient1_210621 | 411036       | 0.03%          | 96.18%       | 2115       | 86.17%     |
| Patient1_060721 | 321277       | 0.00%          | 99.97%       | 2216       | 98.01%     |
| Patient1_120721 | 1064840      | 0.68%          | 87.14%       | 5981       | 85.73%     |
| Patient1_190721 | 365137       | 0.00%          | 99.97%       | 2538       | 99.08%     |
| Patient1_260721 | 361195       | 0.00%          | 99.97%       | 2494       | 98.82%     |
| Patient1_040821 | 609497       | 1.00%          | 89.04%       | 3665       | 97.30%     |
| Patient2_210122 | 809219       | 0.00%          | 99.98%       | 5560       | 97.66%     |
| Patient2_120222 | 745916       | 12.38%         | 89.82%       | 3988       | 97.33%     |
| Patient3_060522 | 819621       | 0.00%          | 99.82%       | 5670       | 97.41%     |
| Patient4_280322 | 720611       | 0.00%          | 99.95%       | 4944       | 97.58%     |
| Patient5_090122 | 73123        | 0.02%          | 99.98%       | 549        | 86.16%     |

**Supplementary Table 1:** metrics of Next Generation Sequencing reported for each viral isolate.
