# Supplementary material
Source: PubMed Central journal article supplement (PMC9583461)
Supplement: 12879_2022_7774_MOESM2_ESM.pdf [file 12879_2022_7774_MOESM2_ESM.pdf]

| Lineage | POS   | REF        | ALT | VAR TYP E | GEN[* ].GT | ANN[* ].GEN E | ANN[*]. FEATUR EID | EFF[* ].RANK | ANN[*].HGVS_C             | ANN[*].HGVS _P       | ANN[*].EFFECT                 | EFF[*]. IMPACT | AF       | QU AL   | DP   | Isolate          |
|---------|-------|------------|-----|-----------|------------|---------------|--------------------|--------------|---------------------------|----------------------|-------------------------------|----------------|----------|---------|------|------------------|
| B.1.1.7 | 241   | C          | T   | SNP       | Homozygous | orf1ab        | QHD43415.1         | -1           | c.-25C>T                  | .                    | upstream_gene_variant         | MODIFIER       | 1.0      | 2979.89 | 897  | Patient 1_030621 |
| B.1.1.7 | 913   | C          | T   | SNP       | Homozygous | orf1ab        | QHD43415.1         | 1            | c.648C>T                  | p.Ser216Ser          | synonymous_variant            | LOW            | 1.0      | 2982.21 | 5925 | Patient 1_030621 |
| B.1.1.7 | 3037  | C          | T   | SNP       | Homozygous | orf1ab        | QHD43415.1         | 1            | c.2772C>T                 | p.Phe924Phe          | synonymous_variant            | LOW            | 0.9975   | 2924.76 | 1360 | Patient 1_030621 |
| B.1.1.7 | 3267  | C          | T   | SNP       | Homozygous | orf1ab        | QHD43415.1         | 1            | c.3002C>T                 | p.Thr1001Ile         | missense_variant              | MODE RATE      | 1.0      | 1563.12 | 211  | Patient 1_030621 |
| B.1.1.7 | 5388  | C          | A   | SNP       | Homozygous | orf1ab        | QHD43415.1         | 1            | c.5123C>A                 | p.Ala1708Asp         | missense_variant              | MODE RATE      | 0.997487 | 2934.01 | 775  | Patient 1_030621 |
| B.1.1.7 | 5986  | C          | T   | SNP       | Homozygous | orf1ab        | QHD43415.1         | 1            | c.5721C>T                 | p.Phe1907Phe         | synonymous_variant            | LOW            | 1.0      | 2657.5  | 354  | Patient 1_030621 |
| B.1.1.7 | 6114  | C          | T   | SNP       | Homozygous | orf1ab        | QHD43415.1         | 1            | c.5849C>T                 | p.Pro1950Leu         | missense_variant              | MODE RATE      | 0.995    | 2919.69 | 1284 | Patient 1_030621 |
| B.1.1.7 | 6954  | T          | C   | SNP       | Homozygous | orf1ab        | QHD43415.1         | 1            | c.6689T>C                 | p.Ile2230Thr         | missense_variant              | MODE RATE      | 0.933718 | 2073.43 | 347  | Patient 1_030621 |
| B.1.1.7 | 7735  | C          | T   | SNP       | Homozygous | orf1ab        | QHD43415.1         | 1            | c.7470C>T                 | p.Ile2490Ile         | synonymous_variant            | LOW            | 1.0      | 2973.03 | 1164 | Patient 1_030621 |
| B.1.1.7 | 11287 | GTCTGGTTTT | G   | DEL       | Homozygous | orf1ab        | QHD43415.1         | 1            | c.11023_11031delTCTGGTTTT | p.Ser3675_Phe3677del | conservative_inframe_deletion | MODE RATE      | 1.0      | 2980.37 | 1802 | Patient 1_030621 |
| B.1.1.7 | 14408 | C          | T   | SNP       | Homozygous | orf1ab        | QHD43415.1         | 2            | c.14144C>T                | p.Pro4715Leu         | missense_variant              | MODE RATE      | 0.997118 | 2548.5  | 347  | Patient 1_030621 |
| B.1.1.7 | 14676 | C          | T   | SNP       | Homozygous | orf1ab        | QHD43415.1         | 2            | c.14412C>T                | p.Pro4804Pro         | synonymous_variant            | LOW            | 1.0      | 2553.92 | 343  | Patient 1_030621 |
| B.1.1.7 | 15279 | C          | T   | SNP       | Homozygous | orf1ab        | QHD43415.1         | 2            | c.15015C>T                | p.His5005His         | synonymous_variant            | LOW            | 1.0      | 2982.21 | 533  | Patient 1_030621 |
| B.1.1.7 | 16176 | T          | C   | SNP       | Homozygous | orf1ab        | QHD43415.1         | 2            | c.15912T>C                | p.Thr5304Thr         | synonymous_variant            | LOW            | 0.997494 | 2939.67 | 919  | Patient 1_030621 |
| B.1.1.7 | 16391 | C          | T   | SNP       | Homozygous | orf1ab        | QHD43415.1         | 2            | c.16127C>T                | p.Ala5376Val         | missense_variant              | MODE RATE      | 0.9975   | 2948.9  | 1505 | Patient 1_030621 |
| B.1.1.7 | 1761  | A          | G   | SNP       | Homozygous | orf1ab        | QHD43415.1         | 2            | c.17351A>G                | p.Lys5784Arg         | missense_variant              | MODE RATE      | 0.9975   | 2379.8  | 772  | Patient 1_030621 |

|         |               |         |   |     |            |       |                |   |                    |                  |                             |           |                  |                 |          |                         |
|---------|---------------|---------|---|-----|------------|-------|----------------|---|--------------------|------------------|-----------------------------|-----------|------------------|-----------------|----------|-------------------------|
|         | 5             |         |   |     | s          |       |                |   |                    |                  |                             |           |                  | 2               |          | 21                      |
| B.1.1.7 | 21<br>76<br>4 | ATACATG | A | DEL | Homozygous | S     | QHD434<br>16.1 | 1 | c.204_209delACATGT | p.His69_Val70del | disruptive_inframe_deletion | MODE RATE | 1.0              | 298<br>2.2<br>1 | 46<br>1  | Patient<br>1_0306<br>21 |
| B.1.1.7 | 21<br>99<br>0 | TTTA    | T | DEL | Homozygous | S     | QHD434<br>16.1 | 1 | c.432_434delTTA    | p.Tyr145del      | disruptive_inframe_deletion | MODE RATE | 1.0              | 235<br>3.3<br>9 | 32<br>0  | Patient<br>1_0306<br>21 |
| B.1.1.7 | 23<br>06<br>3 | A       | T | SNP | Homozygous | S     | QHD434<br>16.1 | 1 | c.1501A>T          | p.Asn501Tyr      | missense_variant            | MODE RATE | 0.9<br>933<br>33 | 869<br>.01<br>6 | 15<br>0  | Patient<br>1_0306<br>21 |
| B.1.1.7 | 23<br>27<br>1 | C       | A | SNP | Homozygous | S     | QHD434<br>16.1 | 1 | c.1709C>A          | p.Ala570Asp      | missense_variant            | MODE RATE | 1.0              | 296<br>7.3<br>3 | 41<br>36 | Patient<br>1_0306<br>21 |
| B.1.1.7 | 23<br>40<br>3 | A       | G | SNP | Homozygous | S     | QHD434<br>16.1 | 1 | c.1841A>G          | p.Asp614Gly      | missense_variant            | MODE RATE | 1.0              | 298<br>2.1<br>7 | 26<br>61 | Patient<br>1_0306<br>21 |
| B.1.1.7 | 23<br>60<br>4 | C       | A | SNP | Homozygous | S     | QHD434<br>16.1 | 1 | c.2042C>A          | p.Pro681His      | missense_variant            | MODE RATE | 0.9<br>974<br>75 | 291<br>9.1<br>8 | 12<br>23 | Patient<br>1_0306<br>21 |
| B.1.1.7 | 23<br>70<br>9 | C       | T | SNP | Homozygous | S     | QHD434<br>16.1 | 1 | c.2147C>T          | p.Thr716Ile      | missense_variant            | MODE RATE | 1.0              | 298<br>2.1<br>2 | 74<br>2  | Patient<br>1_0306<br>21 |
| B.1.1.7 | 24<br>02<br>6 | C       | T | SNP | Homozygous | S     | QHD434<br>16.1 | 1 | c.2464C>T          | p.Leu822Phe      | missense_variant            | MODE RATE | 1.0              | 294<br>0.7<br>9 | 48<br>2  | Patient<br>1_0306<br>21 |
| B.1.1.7 | 24<br>50<br>6 | T       | G | SNP | Homozygous | S     | QHD434<br>16.1 | 1 | c.2944T>G          | p.Ser982Ala      | missense_variant            | MODE RATE | 1.0              | 298<br>2.0<br>4 | 24<br>33 | Patient<br>1_0306<br>21 |
| B.1.1.7 | 24<br>91<br>4 | G       | C | SNP | Homozygous | S     | QHD434<br>16.1 | 1 | c.3352G>C          | p.Asp1118His     | missense_variant            | MODE RATE | 0.9<br>975       | 295<br>0.4<br>5 | 72<br>8  | Patient<br>1_0306<br>21 |
| B.1.1.7 | 26<br>73<br>0 | G       | C | SNP | Homozygous | M     | QHD434<br>19.1 | 1 | c.208G>C           | p.Val70Leu       | missense_variant            | MODE RATE | 1.0              | 298<br>2.1<br>9 | 12<br>95 | Patient<br>1_0306<br>21 |
| B.1.1.7 | 27<br>49<br>4 | C       | T | SNP | Homozygous | ORF7a | QHD434<br>21.1 | 1 | c.101C>T           | p.Pro34Leu       | missense_variant            | MODE RATE | 0.9<br>925       | 289<br>1.9<br>2 | 52<br>6  | Patient<br>1_0306<br>21 |
| B.1.1.7 | 27<br>92<br>9 | T       | A | SNP | Homozygous | ORF8  | QHD434<br>22.1 | 1 | c.36T>A            | p.Thr12Thr       | synonymous_variant          | LOW       | 0.9<br>325       | 238<br>5.7<br>5 | 21<br>37 | Patient<br>1_0306<br>21 |
| B.1.1.7 | 27<br>97<br>2 | C       | T | SNP | Homozygous | ORF8  | QHD434<br>22.1 | 1 | c.79C>T            | p.Gln27*         | stop_gained                 | HIGH      | 0.9<br>85        | 225<br>6.3<br>1 | 24<br>81 | Patient<br>1_0306<br>21 |
| B.1.1.7 | 28<br>04<br>8 | G       | T | SNP | Homozygous | ORF8  | QHD434<br>22.1 | 1 | c.155G>T           | p.Arg52Ile       | missense_variant            | MODE RATE | 1.0              | 297<br>1.2<br>7 | 33<br>85 | Patient<br>1_0306<br>21 |
| B.1.1.7 | 28<br>11<br>1 | A       | G | SNP | Homozygous | ORF8  | QHD434<br>22.1 | 1 | c.218A>G           | p.Tyr73Cys       | missense_variant            | MODE RATE | 1.0              | 298<br>2.2<br>1 | 14<br>04 | Patient<br>1_0306<br>21 |

|         |               |            |     |     |              |        |                |    |                           |                      |                               |          |                  |                 |               |                         |
|---------|---------------|------------|-----|-----|--------------|--------|----------------|----|---------------------------|----------------------|-------------------------------|----------|------------------|-----------------|---------------|-------------------------|
| B.1.1.7 | 28<br>27<br>0 | TA         | T   | DEL | Homozygous   | N      | QHD434<br>23.2 | -1 | c.-3delA                  | .                    | upstream_gene_variant         | MODIFIER | 1.0              | 232<br>0.2      | 18<br>94<br>5 | Patient<br>1_0306<br>21 |
| B.1.1.7 | 28<br>28<br>0 | GAT        | CTA | MNP | Homozygous   | N      | QHD434<br>23.2 | 1  | c.7_9delGATinsCTA         | p.Asp3Leu            | missense_variant              | MODERATE | 1.0              | 296<br>6.7<br>3 | 18<br>84<br>8 | Patient<br>1_0306<br>21 |
| B.1.1.7 | 28<br>88<br>1 | GGG        | AAC | MNP | Homozygous   | N      | QHD434<br>23.2 | 1  | c.608_610delGGGinsAAC     | p.ArgGly203LysArg    | missense_variant              | MODERATE | 1.0              | 295<br>2.2<br>1 | 40<br>77      | Patient<br>1_0306<br>21 |
| B.1.1.7 | 28<br>97<br>7 | C          | T   | SNP | Homozygous   | N      | QHD434<br>23.2 | 1  | c.704C>T                  | p.Ser235Phe          | missense_variant              | MODERATE | 1.0              | 298<br>1.9<br>8 | 39<br>68      | Patient<br>1_0306<br>21 |
| B.1.1.7 | 29<br>10<br>9 | C          | A   | SNP | Homozygous   | N      | QHD434<br>23.2 | 1  | c.836C>A                  | p.Pro279Gln          | missense_variant              | MODERATE | 0.9<br>975       | 237<br>9.9      | 28<br>50      | Patient<br>1_0306<br>21 |
| B.1.1.7 | 24<br>1       | C          | T   | SNP | Homozygous   | orf1ab | QHD434<br>15.1 | -1 | c.-25C>T                  | .                    | upstream_gene_variant         | MODIFIER | 1.0              | 144<br>5.8<br>2 | 19<br>4       | Patient<br>1_2106<br>21 |
| B.1.1.7 | 91<br>3       | C          | T   | SNP | Homozygous   | orf1ab | QHD434<br>15.1 | 1  | c.648C>T                  | p.Ser216Ser          | synonymous_variant            | LOW      | 0.9<br>975       | 294<br>8.9      | 74<br>05      | Patient<br>1_2106<br>21 |
| B.1.1.7 | 30<br>37      | C          | T   | SNP | Homozygous   | orf1ab | QHD434<br>15.1 | 1  | c.2772C>T                 | p.Phe924Phe          | synonymous_variant            | LOW      | 1.0              | 294<br>6.1<br>6 | 19<br>04      | Patient<br>1_2106<br>21 |
| B.1.1.7 | 32<br>67      | C          | T   | SNP | Homozygous   | orf1ab | QHD434<br>15.1 | 1  | c.3002C>T                 | p.Thr1001Ile         | missense_variant              | MODERATE | 1.0              | 194<br>6.7<br>3 | 26<br>1       | Patient<br>1_2106<br>21 |
| B.1.1.7 | 53<br>88      | C          | A   | SNP | Homozygous   | orf1ab | QHD434<br>15.1 | 1  | c.5123C>A                 | p.Ala1708Asp         | missense_variant              | MODERATE | 1.0              | 298<br>2.1<br>9 | 78<br>6       | Patient<br>1_2106<br>21 |
| B.1.1.7 | 59<br>86      | C          | T   | SNP | Homozygous   | orf1ab | QHD434<br>15.1 | 1  | c.5721C>T                 | p.Phe1907Phe         | synonymous_variant            | LOW      | 1.0              | 129<br>0.6<br>8 | 17<br>2       | Patient<br>1_2106<br>21 |
| B.1.1.7 | 61<br>14      | C          | T   | SNP | Homozygous   | orf1ab | QHD434<br>15.1 | 1  | c.5849C>T                 | p.Pro1950Leu         | missense_variant              | MODERATE | 0.9<br>925       | 289<br>1.9<br>1 | 10<br>94      | Patient<br>1_2106<br>21 |
| B.1.1.7 | 69<br>54      | T          | C   | SNP | Heterozygous | orf1ab | QHD434<br>15.1 | 1  | c.6689T>C                 | p.Ile2230Thr         | missense_variant              | MODERATE | 0.8<br>170<br>73 | 103<br>8.8<br>3 | 24<br>6       | Patient<br>1_2106<br>21 |
| B.1.1.7 | 77<br>35      | C          | T   | SNP | Homozygous   | orf1ab | QHD434<br>15.1 | 1  | c.7470C>T                 | p.Ile2490Ile         | synonymous_variant            | LOW      | 0.9<br>975       | 294<br>8.9      | 10<br>22      | Patient<br>1_2106<br>21 |
| B.1.1.7 | 11<br>28<br>7 | GTCTGGTTTT | G   | DEL | Homozygous   | orf1ab | QHD434<br>15.1 | 1  | c.11023_11031delTCTGGTTTT | p.Ser3675_Phe3677del | conservative_inframe_deletion | MODERATE | 1.0              | 295<br>9.9<br>5 | 22<br>46      | Patient<br>1_2106<br>21 |
| B.1.1.7 | 14<br>40<br>8 | C          | T   | SNP | Homozygous   | orf1ab | QHD434<br>15.1 | 2  | c.14144C>T                | p.Pro4715Leu         | missense_variant              | MODERATE | 1.0              | 204<br>5.1<br>1 | 27<br>5       | Patient<br>1_2106<br>21 |
| B.1.1.7 | 14<br>67      | C          | T   | SNP | Homozygous   | orf1ab | QHD434<br>15.1 | 2  | c.14412C>T                | p.Pro4804Pro         | synonymous_variant            | LOW      | 0.9<br>95        | 291<br>3.3      | 49<br>3       | Patient<br>1_2106       |

|         |               |         |   |     |            |        |                |   |                    |                      |                                 |              |                  |                 |          |                         |
|---------|---------------|---------|---|-----|------------|--------|----------------|---|--------------------|----------------------|---------------------------------|--------------|------------------|-----------------|----------|-------------------------|
|         | 6             |         |   |     | s          |        |                |   |                    |                      |                                 |              |                  |                 |          | 21                      |
| B.1.1.7 | 15<br>27<br>9 | C       | T | SNP | Homozygous | orf1ab | QHD434<br>15.1 | 2 | c.15015C>T         | p.His500His          | synonymous_variant              | LOW          | 1.0              | 297<br>7.0      | 42<br>7  | Patient<br>1_2106<br>21 |
| B.1.1.7 | 16<br>17<br>6 | T       | C | SNP | Homozygous | orf1ab | QHD434<br>15.1 | 2 | c.15912T>C         | p.Thr5304Thr         | synonymous_variant              | LOW          | 1.0              | 297<br>1.4<br>1 | 16<br>59 | Patient<br>1_2106<br>21 |
| B.1.1.7 | 16<br>39<br>1 | C       | T | SNP | Homozygous | orf1ab | QHD434<br>15.1 | 2 | c.16127C>T         | p.Ala5376Val         | missense_variant                | MODE<br>RATE | 0.9<br>974<br>94 | 293<br>9.9<br>8 | 23<br>82 | Patient<br>1_2106<br>21 |
| B.1.1.7 | 17<br>61<br>5 | A       | G | SNP | Homozygous | orf1ab | QHD434<br>15.1 | 2 | c.17351A>G         | p.Lys5784Arg         | missense_variant                | MODE<br>RATE | 0.9<br>95        | 289<br>5.5<br>9 | 59<br>8  | Patient<br>1_2106<br>21 |
| B.1.1.7 | 21<br>76<br>4 | ATACATG | A | DEL | Homozygous | S      | QHD434<br>16.1 | 1 | c.204_209delACATGT | p.His69_Val7<br>Odel | disruptive_inframe_d<br>eletion | MODE<br>RATE | 1.0              | 213<br>3.3<br>1 | 28<br>7  | Patient<br>1_2106<br>21 |
| B.1.1.7 | 21<br>99<br>0 | TTTA    | T | DEL | Homozygous | S      | QHD434<br>16.1 | 1 | c.432_434delTTA    | p.Tyr145del          | disruptive_inframe_d<br>eletion | MODE<br>RATE | 0.9<br>923<br>66 | 282<br>8.4<br>7 | 39<br>4  | Patient<br>1_2106<br>21 |
| B.1.1.7 | 23<br>04<br>0 | A       | G | SNP | Homozygous | S      | QHD434<br>16.1 | 1 | c.1478A>G          | p.Gln493Arg          | missense_variant                | MODE<br>RATE | 0.9<br>95        | 291<br>9.6<br>4 | 77<br>4  | Patient<br>1_2106<br>21 |
| B.1.1.7 | 23<br>06<br>3 | A       | T | SNP | Homozygous | S      | QHD434<br>16.1 | 1 | c.1501A>T          | p.Asn501Tyr          | missense_variant                | MODE<br>RATE | 0.9<br>878<br>79 | 117<br>5.9<br>1 | 16<br>6  | Patient<br>1_2106<br>21 |
| B.1.1.7 | 23<br>27<br>1 | C       | A | SNP | Homozygous | S      | QHD434<br>16.1 | 1 | c.1709C>A          | p.Ala570Asp          | missense_variant                | MODE<br>RATE | 1.0              | 297<br>4.3<br>3 | 26<br>79 | Patient<br>1_2106<br>21 |
| B.1.1.7 | 23<br>40<br>3 | A       | G | SNP | Homozygous | S      | QHD434<br>16.1 | 1 | c.1841A>G          | p.Asp614Gly          | missense_variant                | MODE<br>RATE | 0.9<br>975       | 294<br>6.4      | 19<br>36 | Patient<br>1_2106<br>21 |
| B.1.1.7 | 23<br>60<br>4 | C       | A | SNP | Homozygous | S      | QHD434<br>16.1 | 1 | c.2042C>A          | p.Pro681His          | missense_variant                | MODE<br>RATE | 1.0              | 296<br>3.2<br>5 | 99<br>2  | Patient<br>1_2106<br>21 |
| B.1.1.7 | 23<br>70<br>9 | C       | T | SNP | Homozygous | S      | QHD434<br>16.1 | 1 | c.2147C>T          | p.Thr716Ile          | missense_variant                | MODE<br>RATE | 0.9<br>975       | 294<br>8.9      | 52<br>2  | Patient<br>1_2106<br>21 |
| B.1.1.7 | 24<br>02<br>6 | C       | T | SNP | Homozygous | S      | QHD434<br>16.1 | 1 | c.2464C>T          | p.Leu822Phe          | missense_variant                | MODE<br>RATE | 1.0              | 296<br>0.2<br>8 | 75<br>2  | Patient<br>1_2106<br>21 |
| B.1.1.7 | 24<br>50<br>6 | T       | G | SNP | Homozygous | S      | QHD434<br>16.1 | 1 | c.2944T>G          | p.Ser982Ala          | missense_variant                | MODE<br>RATE | 1.0              | 298<br>1.9      | 28<br>19 | Patient<br>1_2106<br>21 |
| B.1.1.7 | 24<br>91<br>4 | G       | C | SNP | Homozygous | S      | QHD434<br>16.1 | 1 | c.3352G>C          | p.Asp1118His         | missense_variant                | MODE<br>RATE | 1.0              | 297<br>4.7<br>5 | 46<br>5  | Patient<br>1_2106<br>21 |
| B.1.1.7 | 26<br>73<br>0 | G       | C | SNP | Homozygous | M      | QHD434<br>19.1 | 1 | c.208G>C           | p.Val70Leu           | missense_variant                | MODE<br>RATE | 1.0              | 298<br>2.1<br>9 | 18<br>18 | Patient<br>1_2106<br>21 |

|         |               |     |     |     |            |        |                |    |                       |                   |                       |              |                  |                 |               |                         |
|---------|---------------|-----|-----|-----|------------|--------|----------------|----|-----------------------|-------------------|-----------------------|--------------|------------------|-----------------|---------------|-------------------------|
| B.1.1.7 | 27<br>49<br>4 | C   | T   | SNP | Homozygous | ORF7a  | QHD434<br>21.1 | 1  | c.101C>T              | p.Pro34Leu        | missense_variant      | MODE<br>RATE | 0.9<br>825       | 279<br>0.7<br>5 | 53<br>2       | Patient<br>1_2106<br>21 |
| B.1.1.7 | 27<br>92<br>9 | T   | A   | SNP | Homozygous | ORF8   | QHD434<br>22.1 | 1  | c.36T>A               | p.Thr12Thr        | synonymous_variant    | LOW          | 0.9<br>599       | 258<br>7.4<br>3 | 58<br>0       | Patient<br>1_2106<br>21 |
| B.1.1.7 | 27<br>97<br>2 | C   | T   | SNP | Homozygous | ORF8   | QHD434<br>22.1 | 1  | c.79C>T               | p.Gln27*          | stop_gained           | HIGH         | 1.0              | 297<br>4.7<br>4 | 91<br>1       | Patient<br>1_2106<br>21 |
| B.1.1.7 | 28<br>04<br>8 | G   | T   | SNP | Homozygous | ORF8   | QHD434<br>22.1 | 1  | c.155G>T              | p.Arg52Ile        | missense_variant      | MODE<br>RATE | 1.0              | 298<br>2.2<br>1 | 13<br>16      | Patient<br>1_2106<br>21 |
| B.1.1.7 | 28<br>11<br>1 | A   | G   | SNP | Homozygous | ORF8   | QHD434<br>22.1 | 1  | c.218A>G              | p.Tyr73Cys        | missense_variant      | MODE<br>RATE | 1.0              | 296<br>7.3      | 52<br>9       | Patient<br>1_2106<br>21 |
| B.1.1.7 | 28<br>27<br>0 | TA  | T   | DEL | Homozygous | N      | QHD434<br>23.2 | -1 | c.-3delA              | .                 | upstream_gene_variant | MODIF<br>IER | 1.0              | 236<br>9.6<br>9 | 10<br>06<br>2 | Patient<br>1_2106<br>21 |
| B.1.1.7 | 28<br>28<br>0 | GAT | CTA | MNP | Homozygous | N      | QHD434<br>23.2 | 1  | c.7_9delGATinsCTA     | p.Asp3Leu         | missense_variant      | MODE<br>RATE | 1.0              | 296<br>7.6<br>2 | 99<br>95      | Patient<br>1_2106<br>21 |
| B.1.1.7 | 28<br>88<br>1 | GGG | AAC | MNP | Homozygous | N      | QHD434<br>23.2 | 1  | c.608_610delGGGinsAAC | p.ArgGly203LysArg | missense_variant      | MODE<br>RATE | 0.9<br>974<br>75 | 291<br>5.4<br>8 | 20<br>26      | Patient<br>1_2106<br>21 |
| B.1.1.7 | 28<br>97<br>7 | C   | T   | SNP | Homozygous | N      | QHD434<br>23.2 | 1  | c.704C>T              | p.Ser235Phe       | missense_variant      | MODE<br>RATE | 0.9<br>975       | 294<br>8.9      | 19<br>99      | Patient<br>1_2106<br>21 |
| B.1.1.7 | 29<br>10<br>9 | C   | A   | SNP | Homozygous | N      | QHD434<br>23.2 | 1  | c.836C>A              | p.Pro279Gln       | missense_variant      | MODE<br>RATE | 0.9<br>925       | 289<br>2.0<br>2 | 96<br>3       | Patient<br>1_2106<br>21 |
| B.1.1.7 | 24<br>1       | C   | T   | SNP | Homozygous | orf1ab | QHD434<br>15.1 | -1 | c.-25C>T              | .                 | upstream_gene_variant | MODIF<br>IER | 0.9<br>975       | 293<br>6.6      | 99<br>0       | Patient<br>1_0607<br>21 |
| B.1.1.7 | 91<br>3       | C   | T   | SNP | Homozygous | orf1ab | QHD434<br>15.1 | 1  | c.648C>T              | p.Ser216Ser       | synonymous_variant    | LOW          | 0.9<br>975       | 294<br>8.9<br>1 | 43<br>09      | Patient<br>1_0607<br>21 |
| B.1.1.7 | 30<br>37      | C   | T   | SNP | Homozygous | orf1ab | QHD434<br>15.1 | 1  | c.2772C>T             | p.Phe924Phe       | synonymous_variant    | LOW          | 1.0              | 294<br>9.1<br>4 | 20<br>32      | Patient<br>1_0607<br>21 |
| B.1.1.7 | 32<br>67      | C   | T   | SNP | Homozygous | orf1ab | QHD434<br>15.1 | 1  | c.3002C>T             | p.Thr1001Ile      | missense_variant      | MODE<br>RATE | 1.0              | 298<br>2.2<br>1 | 13<br>49      | Patient<br>1_0607<br>21 |
| B.1.1.7 | 53<br>88      | C   | A   | SNP | Homozygous | orf1ab | QHD434<br>15.1 | 1  | c.5123C>A             | p.Ala1708Asp      | missense_variant      | MODE<br>RATE | 1.0              | 294<br>4.1<br>7 | 23<br>99      | Patient<br>1_0607<br>21 |
| B.1.1.7 | 59<br>86      | C   | T   | SNP | Homozygous | orf1ab | QHD434<br>15.1 | 1  | c.5721C>T             | p.Phe1907Phe      | synonymous_variant    | LOW          | 1.0              | 297<br>9.6<br>7 | 85<br>2       | Patient<br>1_0607<br>21 |
| B.1.1.7 | 61<br>14      | C   | T   | SNP | Homozygous | orf1ab | QHD434<br>15.1 | 1  | c.5849C>T             | p.Pro1950Leu      | missense_variant      | MODE<br>RATE | 0.9<br>975       | 236<br>1.0      | 20<br>96      | Patient<br>1_0607       |

|         |               |            |   |     |              |            |                |   |                               |                      |                               |              |                  |                 |          |                         |
|---------|---------------|------------|---|-----|--------------|------------|----------------|---|-------------------------------|----------------------|-------------------------------|--------------|------------------|-----------------|----------|-------------------------|
|         |               |            |   |     | s            |            |                |   |                               |                      |                               |              |                  | 5               |          | 21                      |
| B.1.1.7 | 69<br>54      | T          | C | SNP | Homozygous   | orf1a<br>b | QHD434<br>15.1 | 1 | c.6689T>C                     | p.Ile2230Thr         | missense_variant              | MODE<br>RATE | 1.0              | 298<br>2.2      | 89<br>0  | Patient<br>1_0607<br>21 |
| B.1.1.7 | 77<br>35      | C          | T | SNP | Homozygous   | orf1a<br>b | QHD434<br>15.1 | 1 | c.7470C>T                     | p.Ile2490Ile         | synonymous_variant            | LOW          | 1.0              | 296<br>8.4<br>4 | 16<br>77 | Patient<br>1_0607<br>21 |
| B.1.1.7 | 11<br>28<br>7 | GTCTGGTTTT | G | DEL | Homozygous   | orf1a<br>b | QHD434<br>15.1 | 1 | c.11023_11031delTCTG<br>GTTTT | p.Ser3675_Phe3677del | conservative_inframe_deletion | MODE<br>RATE | 1.0              | 295<br>8.3<br>3 | 22<br>05 | Patient<br>1_0607<br>21 |
| B.1.1.7 | 14<br>40<br>8 | C          | T | SNP | Homozygous   | orf1a<br>b | QHD434<br>15.1 | 2 | c.14144C>T                    | p.Pro4715Leu         | missense_variant              | MODE<br>RATE | 0.9<br>975       | 294<br>8.8<br>9 | 77<br>3  | Patient<br>1_0607<br>21 |
| B.1.1.7 | 14<br>67<br>6 | C          | T | SNP | Homozygous   | orf1a<br>b | QHD434<br>15.1 | 2 | c.14412C>T                    | p.Pro4804Pro         | synonymous_variant            | LOW          | 0.9<br>975       | 294<br>8.3<br>6 | 88<br>9  | Patient<br>1_0607<br>21 |
| B.1.1.7 | 15<br>27<br>9 | C          | T | SNP | Homozygous   | orf1a<br>b | QHD434<br>15.1 | 2 | c.15015C>T                    | p.His5005His         | synonymous_variant            | LOW          | 0.9<br>975       | 294<br>8.9      | 13<br>21 | Patient<br>1_0607<br>21 |
| B.1.1.7 | 16<br>17<br>6 | T          | C | SNP | Homozygous   | orf1a<br>b | QHD434<br>15.1 | 2 | c.15912T>C                    | p.Thr5304Thr         | synonymous_variant            | LOW          | 0.9<br>975       | 237<br>9.8<br>8 | 22<br>75 | Patient<br>1_0607<br>21 |
| B.1.1.7 | 16<br>39<br>1 | C          | T | SNP | Homozygous   | orf1a<br>b | QHD434<br>15.1 | 2 | c.16127C>T                    | p.Ala5376Val         | missense_variant              | MODE<br>RATE | 1.0              | 298<br>2.2<br>1 | 27<br>64 | Patient<br>1_0607<br>21 |
| B.1.1.7 | 17<br>61<br>5 | A          | G | SNP | Homozygous   | orf1a<br>b | QHD434<br>15.1 | 2 | c.17351A>G                    | p.Lys5784Arg         | missense_variant              | MODE<br>RATE | 0.9<br>975       | 237<br>9.9      | 22<br>49 | Patient<br>1_0607<br>21 |
| B.1.1.7 | 21<br>76<br>4 | ATACATG    | A | DEL | Homozygous   | S          | QHD434<br>16.1 | 1 | c.204_209delACATGT            | p.His69_Val70del     | disruptive_inframe_deletion   | MODE<br>RATE | 1.0              | 296<br>4.9<br>7 | 86<br>8  | Patient<br>1_0607<br>21 |
| B.1.1.7 | 21<br>99<br>0 | TTTA       | T | DEL | Homozygous   | S          | QHD434<br>16.1 | 1 | c.432_434delTTA               | p.Tyr145del          | disruptive_inframe_deletion   | MODE<br>RATE | 0.8<br>298<br>43 | 283<br>8.4<br>9 | 13<br>16 | Patient<br>1_0607<br>21 |
| B.1.1.7 | 22<br>29<br>0 | C          | T | SNP | Heterozygous | S          | QHD434<br>16.1 | 1 | c.728C>T                      | p.Ala243Val          | missense_variant              | MODE<br>RATE | 0.6<br>075       | 795<br>.44<br>8 | 15<br>11 | Patient<br>1_0607<br>21 |
| B.1.1.7 | 23<br>04<br>0 | A          | G | SNP | Homozygous   | S          | QHD434<br>16.1 | 1 | c.1478A>G                     | p.Gln493Arg          | missense_variant              | MODE<br>RATE | 0.9<br>949<br>87 | 291<br>4.8<br>1 | 21<br>82 | Patient<br>1_0607<br>21 |
| B.1.1.7 | 23<br>06<br>3 | A          | T | SNP | Homozygous   | S          | QHD434<br>16.1 | 1 | c.1501A>T                     | p.Asn501Tyr          | missense_variant              | MODE<br>RATE | 0.9<br>899<br>5  | 285<br>2.2<br>6 | 71<br>8  | Patient<br>1_0607<br>21 |
| B.1.1.7 | 23<br>27<br>1 | C          | A | SNP | Homozygous   | S          | QHD434<br>16.1 | 1 | c.1709C>A                     | p.Ala570Asp          | missense_variant              | MODE<br>RATE | 1.0              | 298<br>2.2      | 31<br>34 | Patient<br>1_0607<br>21 |
| B.1.1.7 | 23<br>40<br>3 | A          | G | SNP | Homozygous   | S          | QHD434<br>16.1 | 1 | c.1841A>G                     | p.Asp614Gly          | missense_variant              | MODE<br>RATE | 0.9<br>949<br>75 | 290<br>6.6<br>4 | 37<br>43 | Patient<br>1_0607<br>21 |

|         |               |     |     |     |              |           |                |    |                       |                   |                       |              |                  |                 |          |                         |
|---------|---------------|-----|-----|-----|--------------|-----------|----------------|----|-----------------------|-------------------|-----------------------|--------------|------------------|-----------------|----------|-------------------------|
| B.1.1.7 | 23<br>60<br>4 | C   | A   | SNP | Homozygous   | S         | QHD434<br>16.1 | 1  | c.2042C>A             | p.Pro681His       | missense_variant      | MODE<br>RATE | 1.0              | 297<br>4.7<br>7 | 16<br>74 | Patient<br>1_0607<br>21 |
| B.1.1.7 | 23<br>70<br>9 | C   | T   | SNP | Homozygous   | S         | QHD434<br>16.1 | 1  | c.2147C>T             | p.Thr716Ile       | missense_variant      | MODE<br>RATE | 1.0              | 298<br>2.1<br>8 | 10<br>40 | Patient<br>1_0607<br>21 |
| B.1.1.7 | 24<br>02<br>6 | C   | T   | SNP | Homozygous   | S         | QHD434<br>16.1 | 1  | c.2464C>T             | p.Leu822Phe       | missense_variant      | MODE<br>RATE | 0.9<br>925       | 283<br>8.9<br>4 | 16<br>12 | Patient<br>1_0607<br>21 |
| B.1.1.7 | 24<br>37<br>4 | C   | T   | SNP | Heterozygous | S         | QHD434<br>16.1 | 1  | c.2812C>T             | p.Leu938Phe       | missense_variant      | MODE<br>RATE | 0.4<br>711<br>78 | 399<br>.47<br>9 | 73<br>6  | Patient<br>1_0607<br>21 |
| B.1.1.7 | 24<br>50<br>6 | T   | G   | SNP | Homozygous   | S         | QHD434<br>16.1 | 1  | c.2944T>G             | p.Ser982Ala       | missense_variant      | MODE<br>RATE | 1.0              | 298<br>2.0      | 24<br>15 | Patient<br>1_0607<br>21 |
| B.1.1.7 | 24<br>91<br>4 | G   | C   | SNP | Homozygous   | S         | QHD434<br>16.1 | 1  | c.3352G>C             | p.Asp1118His      | missense_variant      | MODE<br>RATE | 0.9<br>974<br>94 | 237<br>3.8<br>7 | 13<br>72 | Patient<br>1_0607<br>21 |
| B.1.1.7 | 26<br>73<br>0 | G   | C   | SNP | Homozygous   | M         | QHD434<br>19.1 | 1  | c.208G>C              | p.Val70Leu        | missense_variant      | MODE<br>RATE | 1.0              | 298<br>2.1<br>6 | 27<br>10 | Patient<br>1_0607<br>21 |
| B.1.1.7 | 27<br>49<br>4 | C   | T   | SNP | Homozygous   | ORF7<br>a | QHD434<br>21.1 | 1  | c.101C>T              | p.Pro34Leu        | missense_variant      | MODE<br>RATE | 0.9<br>924<br>81 | 288<br>6.4<br>6 | 89<br>0  | Patient<br>1_0607<br>21 |
| B.1.1.7 | 27<br>92<br>9 | T   | A   | SNP | Homozygous   | ORF8      | QHD434<br>22.1 | 1  | c.36T>A               | p.Thr12Thr        | synonymous_variant    | LOW          | 1.0              | 298<br>2.0<br>2 | 23<br>61 | Patient<br>1_0607<br>21 |
| B.1.1.7 | 27<br>97<br>2 | C   | T   | SNP | Homozygous   | ORF8      | QHD434<br>22.1 | 1  | c.79C>T               | p.Gln27*          | stop_gained           | HIGH         | 0.9<br>975       | 294<br>8.9      | 54<br>83 | Patient<br>1_0607<br>21 |
| B.1.1.7 | 28<br>04<br>8 | G   | T   | SNP | Homozygous   | ORF8      | QHD434<br>22.1 | 1  | c.155G>T              | p.Arg52Ile        | missense_variant      | MODE<br>RATE | 1.0              | 298<br>2.2<br>1 | 54<br>84 | Patient<br>1_0607<br>21 |
| B.1.1.7 | 28<br>11<br>1 | A   | G   | SNP | Homozygous   | ORF8      | QHD434<br>22.1 | 1  | c.218A>G              | p.Tyr73Cys        | missense_variant      | MODE<br>RATE | 1.0              | 298<br>2.2<br>1 | 31<br>40 | Patient<br>1_0607<br>21 |
| B.1.1.7 | 28<br>27<br>0 | TA  | T   | DEL | Homozygous   | N         | QHD434<br>23.2 | -1 | c.-3delA              | .                 | upstream_gene_variant | MODIFIER     | 1.0              | 234<br>0.3<br>4 | 71<br>81 | Patient<br>1_0607<br>21 |
| B.1.1.7 | 28<br>28<br>0 | GAT | CTA | MNP | Homozygous   | N         | QHD434<br>23.2 | 1  | c.7_9delGATinsCTA     | p.Asp3Leu         | missense_variant      | MODE<br>RATE | 1.0              | 298<br>2.2<br>1 | 71<br>53 | Patient<br>1_0607<br>21 |
| B.1.1.7 | 28<br>88<br>1 | GGG | AAC | MNP | Homozygous   | N         | QHD434<br>23.2 | 1  | c.608_610delGGGinsAAC | p.ArgGly203LysArg | missense_variant      | MODE<br>RATE | 1.0              | 298<br>2.2<br>1 | 26<br>39 | Patient<br>1_0607<br>21 |
| B.1.1.7 | 28<br>97<br>7 | C   | T   | SNP | Homozygous   | N         | QHD434<br>23.2 | 1  | c.704C>T              | p.Ser235Phe       | missense_variant      | MODE<br>RATE | 1.0              | 298<br>1.6<br>7 | 26<br>12 | Patient<br>1_0607<br>21 |
| B.1.1.7 | 29<br>10      | C   | A   | SNP | Homozygous   | N         | QHD434<br>23.2 | 1  | c.836C>A              | p.Pro279Gln       | missense_variant      | MODE<br>RATE | 0.9<br>974       | 291<br>6.5      | 30<br>35 | Patient<br>1_0607       |

|         |       |            |   |     |            |        |            |    |                           |                      |                               |           |          |         |      |                 |
|---------|-------|------------|---|-----|------------|--------|------------|----|---------------------------|----------------------|-------------------------------|-----------|----------|---------|------|-----------------|
|         | 9     |            |   |     | s          |        |            |    |                           |                      |                               |           | 94       |         |      | 21              |
| B.1.1.7 | 241   | C          | T | SNP | Homozygous | orf1ab | QHD43415.1 | -1 | c.-25C>T                  | .                    | upstream_gene_variant         | MODIFIER  | 1.0      | 2974.47 | 1544 | Patient1_120721 |
| B.1.1.7 | 913   | C          | T | SNP | Homozygous | orf1ab | QHD43415.1 | 1  | c.648C>T                  | p.Ser216Ser          | synonymous_variant            | LOW       | 0.9975   | 2948.83 | 9071 | Patient1_120721 |
| B.1.1.7 | 3037  | C          | T | SNP | Homozygous | orf1ab | QHD43415.1 | 1  | c.2772C>T                 | p.Phe924Phe          | synonymous_variant            | LOW       | 1.0      | 2944.85 | 4884 | Patient1_120721 |
| B.1.1.7 | 3267  | C          | T | SNP | Homozygous | orf1ab | QHD43415.1 | 1  | c.3002C>T                 | p.Thr1001Ile         | missense_variant              | MODE RATE | 0.9975   | 2951.18 | 1001 | Patient1_120721 |
| B.1.1.7 | 5388  | C          | A | SNP | Homozygous | orf1ab | QHD43415.1 | 1  | c.5123C>A                 | p.Ala1708Asp         | missense_variant              | MODE RATE | 1.0      | 2974.67 | 2633 | Patient1_120721 |
| B.1.1.7 | 5986  | C          | T | SNP | Homozygous | orf1ab | QHD43415.1 | 1  | c.5721C>T                 | p.Phe1907Phe         | synonymous_variant            | LOW       | 1.0      | 2979.43 | 664  | Patient1_120721 |
| B.1.1.7 | 6114  | C          | T | SNP | Homozygous | orf1ab | QHD43415.1 | 1  | c.5849C>T                 | p.Pro1950Leu         | missense_variant              | MODE RATE | 0.997494 | 2942.67 | 2942 | Patient1_120721 |
| B.1.1.7 | 6954  | T          | C | SNP | Homozygous | orf1ab | QHD43415.1 | 1  | c.6689T>C                 | p.Ile2230Thr         | missense_variant              | MODE RATE | 1.0      | 2982.21 | 529  | Patient1_120721 |
| B.1.1.7 | 7735  | C          | T | SNP | Homozygous | orf1ab | QHD43415.1 | 1  | c.7470C>T                 | p.Ile2490Ile         | synonymous_variant            | LOW       | 1.0      | 2974.01 | 2044 | Patient1_120721 |
| B.1.1.7 | 11287 | GTCTGGTTTT | G | DEL | Homozygous | orf1ab | QHD43415.1 | 1  | c.11023_11031delTCTGGTTTT | p.Ser3675_Phe3677del | conservative_inframe_deletion | MODE RATE | 1.0      | 2952.02 | 4024 | Patient1_120721 |
| B.1.1.7 | 14408 | C          | T | SNP | Homozygous | orf1ab | QHD43415.1 | 2  | c.14144C>T                | p.Pro4715Leu         | missense_variant              | MODE RATE | 0.995    | 2914.35 | 1419 | Patient1_120721 |
| B.1.1.7 | 14676 | C          | T | SNP | Homozygous | orf1ab | QHD43415.1 | 2  | c.14412C>T                | p.Pro4804Pro         | synonymous_variant            | LOW       | 1.0      | 2944.87 | 1283 | Patient1_120721 |
| B.1.1.7 | 15279 | C          | T | SNP | Homozygous | orf1ab | QHD43415.1 | 2  | c.15015C>T                | p.His5005His         | synonymous_variant            | LOW       | 0.9975   | 2948.86 | 1403 | Patient1_120721 |
| B.1.1.7 | 16176 | T          | C | SNP | Homozygous | orf1ab | QHD43415.1 | 2  | c.15912T>C                | p.Thr5304Thr         | synonymous_variant            | LOW       | 0.995    | 2919.6  | 2072 | Patient1_120721 |
| B.1.1.7 | 16391 | C          | T | SNP | Homozygous | orf1ab | QHD43415.1 | 2  | c.16127C>T                | p.Ala5376Val         | missense_variant              | MODE RATE | 0.9975   | 2947.75 | 4291 | Patient1_120721 |
| B.1.1.7 | 17615 | A          | G | SNP | Homozygous | orf1ab | QHD43415.1 | 2  | c.17351A>G                | p.Lys5784Arg         | missense_variant              | MODE RATE | 0.992481 | 2885.05 | 3157 | Patient1_120721 |



|         |               |         |   |     |              |            |                |   |                    |                  |                             |              |                  |                 |          |                         |
|---------|---------------|---------|---|-----|--------------|------------|----------------|---|--------------------|------------------|-----------------------------|--------------|------------------|-----------------|----------|-------------------------|
| B.1.1.7 | 20<br>10<br>4 | C       | T | SNP | Heterozygous | orf1a<br>b | QHD434<br>15.1 | 2 | c.19840C>T         | p.Leu6614Phe     | missense_variant            | MODE<br>RATE | 0.2<br>741<br>94 | 472<br>.52<br>4 | 31<br>0  | Patient<br>1_1207<br>21 |
| B.1.1.7 | 21<br>76<br>4 | ATACATG | A | DEL | Homozygous   | S          | QHD434<br>16.1 | 1 | c.204_209delACATGT | p.His69_Val70del | disruptive_inframe_deletion | MODE<br>RATE | 1.0              | 295<br>2.7<br>9 | 19<br>92 | Patient<br>1_1207<br>21 |
| B.1.1.7 | 21<br>99<br>0 | TTTA    | T | DEL | Homozygous   | S          | QHD434<br>16.1 | 1 | c.432_434delTTA    | p.Tyr145del      | disruptive_inframe_deletion | MODE<br>RATE | 1.0              | 294<br>2.1<br>8 | 27<br>78 | Patient<br>1_1207<br>21 |
| B.1.1.7 | 22<br>29<br>0 | C       | T | SNP | Heterozygous | S          | QHD434<br>16.1 | 1 | c.728C>T           | p.Ala243Val      | missense_variant            | MODE<br>RATE | 0.2<br>575       | 420<br>.89<br>7 | 19<br>78 | Patient<br>1_1207<br>21 |
| B.1.1.7 | 22<br>89<br>9 | G       | T | SNP | Heterozygous | S          | QHD434<br>16.1 | 1 | c.1337G>T          | p.Gly446Val      | missense_variant            | MODE<br>RATE | 0.3<br>175       | 108<br>.22<br>7 | 97<br>00 | Patient<br>1_1207<br>21 |
| B.1.1.7 | 23<br>04<br>0 | A       | G | SNP | Homozygous   | S          | QHD434<br>16.1 | 1 | c.1478A>G          | p.Gln493Arg      | missense_variant            | MODE<br>RATE | 1.0              | 296<br>6.5<br>9 | 28<br>21 | Patient<br>1_1207<br>21 |
| B.1.1.7 | 23<br>06<br>3 | A       | T | SNP | Homozygous   | S          | QHD434<br>16.1 | 1 | c.1501A>T          | p.Asn501Tyr      | missense_variant            | MODE<br>RATE | 1.0              | 297<br>5.1<br>9 | 97<br>8  | Patient<br>1_1207<br>21 |
| B.1.1.7 | 23<br>27<br>1 | C       | A | SNP | Homozygous   | S          | QHD434<br>16.1 | 1 | c.1709C>A          | p.Ala570Asp      | missense_variant            | MODE<br>RATE | 1.0              | 295<br>9.5<br>6 | 83<br>74 | Patient<br>1_1207<br>21 |
| B.1.1.7 | 23<br>40<br>3 | A       | G | SNP | Homozygous   | S          | QHD434<br>16.1 | 1 | c.1841A>G          | p.Asp614Gly      | missense_variant            | MODE<br>RATE | 1.0              | 297<br>3.7<br>6 | 94<br>26 | Patient<br>1_1207<br>21 |
| B.1.1.7 | 23<br>60<br>4 | C       | A | SNP | Homozygous   | S          | QHD434<br>16.1 | 1 | c.2042C>A          | p.Pro681His      | missense_variant            | MODE<br>RATE | 1.0              | 296<br>7.2<br>8 | 50<br>64 | Patient<br>1_1207<br>21 |
| B.1.1.7 | 23<br>70<br>9 | C       | T | SNP | Homozygous   | S          | QHD434<br>16.1 | 1 | c.2147C>T          | p.Thr716Ile      | missense_variant            | MODE<br>RATE | 0.9<br>925       | 289<br>1.8<br>6 | 24<br>33 | Patient<br>1_1207<br>21 |
| B.1.1.7 | 24<br>02<br>6 | C       | T | SNP | Homozygous   | S          | QHD434<br>16.1 | 1 | c.2464C>T          | p.Leu822Phe      | missense_variant            | MODE<br>RATE | 0.9<br>974<br>62 | 287<br>5.4<br>9 | 14<br>26 | Patient<br>1_1207<br>21 |
| B.1.1.7 | 24<br>37<br>4 | C       | T | SNP | Heterozygous | S          | QHD434<br>16.1 | 1 | c.2812C>T          | p.Leu938Phe      | missense_variant            | MODE<br>RATE | 0.3<br>75        | 195<br>.85<br>7 | 15<br>29 | Patient<br>1_1207<br>21 |
| B.1.1.7 | 24<br>50<br>6 | T       | G | SNP | Homozygous   | S          | QHD434<br>16.1 | 1 | c.2944T>G          | p.Ser982Ala      | missense_variant            | MODE<br>RATE | 0.9<br>975       | 294<br>8.7<br>7 | 69<br>21 | Patient<br>1_1207<br>21 |
| B.1.1.7 | 24<br>91<br>4 | G       | C | SNP | Homozygous   | S          | QHD434<br>16.1 | 1 | c.3352G>C          | p.Asp1118His     | missense_variant            | MODE<br>RATE | 1.0              | 295<br>9.9<br>6 | 31<br>97 | Patient<br>1_1207<br>21 |
| B.1.1.7 | 26<br>73<br>0 | G       | C | SNP | Homozygous   | M          | QHD434<br>19.1 | 1 | c.208G>C           | p.Val70Leu       | missense_variant            | MODE<br>RATE | 1.0              | 298<br>2.0<br>9 | 67<br>09 | Patient<br>1_1207<br>21 |
| B.1.1.7 | 27<br>49      | C       | T | SNP | Homozygous   | ORF7<br>a  | QHD434<br>21.1 | 1 | c.101C>T           | p.Pro34Leu       | missense_variant            | MODE<br>RATE | 0.9<br>975       | 294<br>8.8      | 38<br>08 | Patient<br>1_1207       |

|         |               |     |     |     |            |        |                |    |                       |                   |                       |              |                  |                 |               |                         |
|---------|---------------|-----|-----|-----|------------|--------|----------------|----|-----------------------|-------------------|-----------------------|--------------|------------------|-----------------|---------------|-------------------------|
|         | 4             |     |     |     | s          |        |                |    |                       |                   |                       |              |                  | 6               |               | 21                      |
| B.1.1.7 | 27<br>92<br>9 | T   | A   | SNP | Homozygous | ORF8   | QHD434<br>22.1 | 1  | c.36T>A               | p.Thr12Thr        | synonymous_variant    | LOW          | 0.9<br>975       | 294<br>8.8<br>9 | 92<br>88      | Patient<br>1_1207<br>21 |
| B.1.1.7 | 27<br>97<br>2 | C   | T   | SNP | Homozygous | ORF8   | QHD434<br>22.1 | 1  | c.79C>T               | p.Gln27*          | stop_gained           | HIGH         | 0.9<br>975       | 294<br>8.9      | 16<br>70<br>6 | Patient<br>1_1207<br>21 |
| B.1.1.7 | 28<br>04<br>8 | G   | T   | SNP | Homozygous | ORF8   | QHD434<br>22.1 | 1  | c.155G>T              | p.Arg52Ile        | missense_variant      | MODE<br>RATE | 1.0              | 298<br>2.2<br>1 | 16<br>87<br>9 | Patient<br>1_1207<br>21 |
| B.1.1.7 | 28<br>11<br>1 | A   | G   | SNP | Homozygous | ORF8   | QHD434<br>22.1 | 1  | c.218A>G              | p.Tyr73Cys        | missense_variant      | MODE<br>RATE | 1.0              | 296<br>3.0<br>2 | 75<br>84      | Patient<br>1_1207<br>21 |
| B.1.1.7 | 28<br>27<br>0 | TA  | T   | DEL | Homozygous | N      | QHD434<br>23.2 | -1 | c.-3delA              | .                 | upstream_gene_variant | MODIF<br>IER | 1.0              | 231<br>0.9<br>7 | 61<br>66<br>7 | Patient<br>1_1207<br>21 |
| B.1.1.7 | 28<br>28<br>0 | GAT | CTA | MNP | Homozygous | N      | QHD434<br>23.2 | 1  | c.7_9delGATinsCTA     | p.Asp3Leu         | missense_variant      | MODE<br>RATE | 1.0              | 295<br>9.7<br>9 | 61<br>47<br>7 | Patient<br>1_1207<br>21 |
| B.1.1.7 | 28<br>88<br>1 | GGG | AAC | MNP | Homozygous | N      | QHD434<br>23.2 | 1  | c.608_610delGGGinsAAC | p.ArgGly203LysArg | missense_variant      | MODE<br>RATE | 1.0              | 296<br>7.3<br>4 | 25<br>06<br>8 | Patient<br>1_1207<br>21 |
| B.1.1.7 | 28<br>97<br>7 | C   | T   | SNP | Homozygous | N      | QHD434<br>23.2 | 1  | c.704C>T              | p.Ser235Phe       | missense_variant      | MODE<br>RATE | 0.9<br>95        | 291<br>9.6<br>6 | 24<br>96<br>2 | Patient<br>1_1207<br>21 |
| B.1.1.7 | 29<br>10<br>9 | C   | A   | SNP | Homozygous | N      | QHD434<br>23.2 | 1  | c.836C>A              | p.Pro279Gln       | missense_variant      | MODE<br>RATE | 0.9<br>95        | 291<br>9.8<br>2 | 15<br>11<br>9 | Patient<br>1_1207<br>21 |
| B.1.1.7 | 24<br>1       | C   | T   | SNP | Homozygous | orf1ab | QHD434<br>15.1 | -1 | c.-25C>T              | .                 | upstream_gene_variant | MODIF<br>IER | 0.9<br>975       | 294<br>2.5<br>9 | 15<br>52      | Patient<br>1_1907<br>21 |
| B.1.1.7 | 91<br>3       | C   | T   | SNP | Homozygous | orf1ab | QHD434<br>15.1 | 1  | c.648C>T              | p.Ser216Ser       | synonymous_variant    | LOW          | 0.9<br>974<br>94 | 294<br>3.1<br>9 | 41<br>62      | Patient<br>1_1907<br>21 |
| B.1.1.7 | 30<br>37      | C   | T   | SNP | Homozygous | orf1ab | QHD434<br>15.1 | 1  | c.2772C>T             | p.Phe924Phe       | synonymous_variant    | LOW          | 1.0              | 295<br>1.9<br>7 | 26<br>00      | Patient<br>1_1907<br>21 |
| B.1.1.7 | 32<br>67      | C   | T   | SNP | Homozygous | orf1ab | QHD434<br>15.1 | 1  | c.3002C>T             | p.Thr1001Ile      | missense_variant      | MODE<br>RATE | 1.0              | 298<br>2.2      | 17<br>17      | Patient<br>1_1907<br>21 |
| B.1.1.7 | 53<br>88      | C   | A   | SNP | Homozygous | orf1ab | QHD434<br>15.1 | 1  | c.5123C>A             | p.Ala1708Asp      | missense_variant      | MODE<br>RATE | 1.0              | 298<br>2.2      | 21<br>43      | Patient<br>1_1907<br>21 |
| B.1.1.7 | 59<br>86      | C   | T   | SNP | Homozygous | orf1ab | QHD434<br>15.1 | 1  | c.5721C>T             | p.Phe1907Phe      | synonymous_variant    | LOW          | 1.0              | 297<br>4.3      | 97<br>7       | Patient<br>1_1907<br>21 |
| B.1.1.7 | 61<br>14      | C   | T   | SNP | Homozygous | orf1ab | QHD434<br>15.1 | 1  | c.5849C>T             | p.Pro1950Leu      | missense_variant      | MODE<br>RATE | 0.9<br>9         | 286<br>5.7<br>5 | 21<br>34      | Patient<br>1_1907<br>21 |

|         |               |            |   |     |              |            |                |   |                               |                      |                               |              |                  |                 |          |                         |
|---------|---------------|------------|---|-----|--------------|------------|----------------|---|-------------------------------|----------------------|-------------------------------|--------------|------------------|-----------------|----------|-------------------------|
| B.1.1.7 | 69<br>54      | T          | C | SNP | Homozygous   | orf1a<br>b | QHD434<br>15.1 | 1 | c.6689T>C                     | p.Ile2230Thr         | missense_variant              | MODE<br>RATE | 0.9<br>974<br>94 | 294<br>1.4<br>7 | 14<br>50 | Patient<br>1_1907<br>21 |
| B.1.1.7 | 77<br>35      | C          | T | SNP | Homozygous   | orf1a<br>b | QHD434<br>15.1 | 1 | c.7470C>T                     | p.Ile2490Ile         | synonymous_variant            | LOW          | 0.9<br>974<br>94 | 294<br>2.2<br>3 | 24<br>01 | Patient<br>1_1907<br>21 |
| B.1.1.7 | 11<br>28<br>7 | GTCTGGTTTT | G | DEL | Homozygous   | orf1a<br>b | QHD434<br>15.1 | 1 | c.11023_11031delTCTG<br>GTTTT | p.Ser3675_Phe3677del | conservative_inframe_deletion | MODE<br>RATE | 1.0              | 297<br>5.3<br>2 | 29<br>52 | Patient<br>1_1907<br>21 |
| B.1.1.7 | 14<br>40<br>8 | C          | T | SNP | Homozygous   | orf1a<br>b | QHD434<br>15.1 | 2 | c.14144C>T                    | p.Pro4715Leu         | missense_variant              | MODE<br>RATE | 1.0              | 298<br>2.2      | 10<br>71 | Patient<br>1_1907<br>21 |
| B.1.1.7 | 14<br>67<br>6 | C          | T | SNP | Homozygous   | orf1a<br>b | QHD434<br>15.1 | 2 | c.14412C>T                    | p.Pro4804Pro         | synonymous_variant            | LOW          | 0.9<br>924<br>81 | 288<br>3.6<br>8 | 14<br>01 | Patient<br>1_1907<br>21 |
| B.1.1.7 | 15<br>27<br>9 | C          | T | SNP | Homozygous   | orf1a<br>b | QHD434<br>15.1 | 2 | c.15015C>T                    | p.His5005His         | synonymous_variant            | LOW          | 1.0              | 298<br>2.2      | 16<br>15 | Patient<br>1_1907<br>21 |
| B.1.1.7 | 16<br>17<br>6 | T          | C | SNP | Homozygous   | orf1a<br>b | QHD434<br>15.1 | 2 | c.15912T>C                    | p.Thr5304Thr         | synonymous_variant            | LOW          | 0.9<br>9         | 286<br>5.1<br>8 | 28<br>08 | Patient<br>1_1907<br>21 |
| B.1.1.7 | 16<br>39<br>1 | C          | T | SNP | Homozygous   | orf1a<br>b | QHD434<br>15.1 | 2 | c.16127C>T                    | p.Ala5376Val         | missense_variant              | MODE<br>RATE | 1.0              | 298<br>2.1<br>2 | 35<br>42 | Patient<br>1_1907<br>21 |
| B.1.1.7 | 17<br>61<br>5 | A          | G | SNP | Homozygous   | orf1a<br>b | QHD434<br>15.1 | 2 | c.17351A>G                    | p.Lys5784Arg         | missense_variant              | MODE<br>RATE | 0.9<br>949<br>87 | 234<br>3.7<br>5 | 23<br>79 | Patient<br>1_1907<br>21 |
| B.1.1.7 | 20<br>67<br>9 | G          | T | SNP | Heterozygous | orf1a<br>b | QHD434<br>15.1 | 2 | c.20415G>T                    | p.Pro6805Pro         | synonymous_variant            | LOW          | 0.3<br>366<br>83 | 135<br>.00<br>2 | 19<br>67 | Patient<br>1_1907<br>21 |
| B.1.1.7 | 21<br>76<br>4 | ATACATG    | A | DEL | Homozygous   | S          | QHD434<br>16.1 | 1 | c.204_209delACATGT            | p.His69_Val70del     | disruptive_inframe_deletion   | MODE<br>RATE | 1.0              | 297<br>4.9<br>5 | 19<br>19 | Patient<br>1_1907<br>21 |
| B.1.1.7 | 21<br>86<br>7 | G          | T | SNP | Heterozygous | S          | QHD434<br>16.1 | 1 | c.305G>T                      | p.Arg102Ile          | missense_variant              | MODE<br>RATE | 0.6<br>35        | 893<br>.87<br>4 | 24<br>95 | Patient<br>1_1907<br>21 |
| B.1.1.7 | 21<br>99<br>0 | TTTA       | T | DEL | Homozygous   | S          | QHD434<br>16.1 | 1 | c.432_434delTTA               | p.Tyr145del          | disruptive_inframe_deletion   | MODE<br>RATE | 1.0              | 281<br>9.8<br>1 | 14<br>95 | Patient<br>1_1907<br>21 |
| B.1.1.7 | 22<br>29<br>9 | G          | T | SNP | Heterozygous | S          | QHD434<br>16.1 | 1 | c.737G>T                      | p.Arg246Ile          | missense_variant              | MODE<br>RATE | 0.2<br>781<br>95 | 620<br>.67<br>1 | 22<br>48 | Patient<br>1_1907<br>21 |
| B.1.1.7 | 22<br>89<br>9 | G          | T | SNP | Homozygous   | S          | QHD434<br>16.1 | 1 | c.1337G>T                     | p.Gly446Val          | missense_variant              | MODE<br>RATE | 0.9<br>273<br>18 | 233<br>1.7<br>9 | 43<br>82 | Patient<br>1_1907<br>21 |
| B.1.1.7 | 23<br>01<br>2 | G          | C | SNP | Heterozygous | S          | QHD434<br>16.1 | 1 | c.1450G>C                     | p.Glu484Gln          | missense_variant              | MODE<br>RATE | 0.6<br>175       | 833<br>.24<br>2 | 28<br>37 | Patient<br>1_1907<br>21 |
| B.1.1.7 | 23<br>04      | A          | G | SNP | Homozygous   | S          | QHD434<br>16.1 | 1 | c.1478A>G                     | p.Gln493Arg          | missense_variant              | MODE<br>RATE | 1.0              | 293<br>9.0      | 28<br>84 | Patient<br>1_1907       |

|         |               |    |   |     |              |           |                |    |           |              |                       |              |                  |                 |          |                         |
|---------|---------------|----|---|-----|--------------|-----------|----------------|----|-----------|--------------|-----------------------|--------------|------------------|-----------------|----------|-------------------------|
|         | 0             |    |   |     | s            |           |                |    |           |              |                       |              |                  | 9               |          | 21                      |
| B.1.1.7 | 23<br>06<br>3 | A  | T | SNP | Homozygous   | S         | QHD434<br>16.1 | 1  | c.1501A>T | p.Asn501Tyr  | missense_variant      | MODE<br>RATE | 1.0              | 296<br>7.1<br>6 | 10<br>39 | Patient<br>1_1907<br>21 |
| B.1.1.7 | 23<br>27<br>1 | C  | A | SNP | Homozygous   | S         | QHD434<br>16.1 | 1  | c.1709C>A | p.Ala570Asp  | missense_variant      | MODE<br>RATE | 0.9<br>974<br>94 | 294<br>1.5<br>3 | 30<br>62 | Patient<br>1_1907<br>21 |
| B.1.1.7 | 23<br>40<br>3 | A  | G | SNP | Homozygous   | S         | QHD434<br>16.1 | 1  | c.1841A>G | p.Asp614Gly  | missense_variant      | MODE<br>RATE | 1.0              | 298<br>1.8<br>9 | 39<br>81 | Patient<br>1_1907<br>21 |
| B.1.1.7 | 23<br>60<br>4 | C  | A | SNP | Homozygous   | S         | QHD434<br>16.1 | 1  | c.2042C>A | p.Pro681His  | missense_variant      | MODE<br>RATE | 1.0              | 298<br>2.2<br>1 | 22<br>99 | Patient<br>1_1907<br>21 |
| B.1.1.7 | 23<br>70<br>9 | C  | T | SNP | Homozygous   | S         | QHD434<br>16.1 | 1  | c.2147C>T | p.Thr716Ile  | missense_variant      | MODE<br>RATE | 0.9<br>975       | 294<br>8.8<br>4 | 14<br>77 | Patient<br>1_1907<br>21 |
| B.1.1.7 | 24<br>02<br>6 | C  | T | SNP | Homozygous   | S         | QHD434<br>16.1 | 1  | c.2464C>T | p.Leu822Phe  | missense_variant      | MODE<br>RATE | 1.0              | 291<br>3.2      | 18<br>58 | Patient<br>1_1907<br>21 |
| B.1.1.7 | 24<br>50<br>6 | T  | G | SNP | Homozygous   | S         | QHD434<br>16.1 | 1  | c.2944T>G | p.Ser982Ala  | missense_variant      | MODE<br>RATE | 1.0              | 298<br>1.9<br>2 | 26<br>40 | Patient<br>1_1907<br>21 |
| B.1.1.7 | 24<br>91<br>4 | G  | C | SNP | Homozygous   | S         | QHD434<br>16.1 | 1  | c.3352G>C | p.Asp1118His | missense_variant      | MODE<br>RATE | 0.9<br>975       | 294<br>8.8<br>7 | 23<br>17 | Patient<br>1_1907<br>21 |
| B.1.1.7 | 26<br>42<br>8 | G  | T | SNP | Heterozygous | E         | QHD434<br>18.1 | 1  | c.184G>T  | p.Val62Phe   | missense_variant      | MODE<br>RATE | 0.2<br>825       | 667<br>.35<br>4 | 21<br>14 | Patient<br>1_1907<br>21 |
| B.1.1.7 | 26<br>73<br>0 | G  | C | SNP | Homozygous   | M         | QHD434<br>19.1 | 1  | c.208G>C  | p.Val70Leu   | missense_variant      | MODE<br>RATE | 1.0              | 298<br>2.2      | 24<br>50 | Patient<br>1_1907<br>21 |
| B.1.1.7 | 27<br>49<br>4 | C  | T | SNP | Homozygous   | ORF7<br>a | QHD434<br>21.1 | 1  | c.101C>T  | p.Pro34Leu   | missense_variant      | MODE<br>RATE | 1.0              | 295<br>4.8<br>1 | 16<br>84 | Patient<br>1_1907<br>21 |
| B.1.1.7 | 27<br>92<br>9 | T  | A | SNP | Homozygous   | ORF8      | QHD434<br>22.1 | 1  | c.36T>A   | p.Thr12Thr   | synonymous_variant    | LOW          | 1.0              | 298<br>1.6<br>8 | 37<br>45 | Patient<br>1_1907<br>21 |
| B.1.1.7 | 27<br>97<br>2 | C  | T | SNP | Homozygous   | ORF8      | QHD434<br>22.1 | 1  | c.79C>T   | p.Gln27*     | stop_gained           | HIGH         | 0.9<br>975       | 294<br>8.7<br>5 | 91<br>46 | Patient<br>1_1907<br>21 |
| B.1.1.7 | 28<br>04<br>8 | G  | T | SNP | Homozygous   | ORF8      | QHD434<br>22.1 | 1  | c.155G>T  | p.Arg52Ile   | missense_variant      | MODE<br>RATE | 1.0              | 297<br>4.7<br>7 | 91<br>88 | Patient<br>1_1907<br>21 |
| B.1.1.7 | 28<br>11<br>1 | A  | G | SNP | Homozygous   | ORF8      | QHD434<br>22.1 | 1  | c.218A>G  | p.Tyr73Cys   | missense_variant      | MODE<br>RATE | 0.9<br>975       | 294<br>9.8<br>3 | 54<br>18 | Patient<br>1_1907<br>21 |
| B.1.1.7 | 28<br>27<br>0 | TA | T | DEL | Homozygous   | N         | QHD434<br>23.2 | -1 | c.-3delA  | .            | upstream_gene_variant | MODIFIER     | 1.0              | 234<br>6.2<br>4 | 96<br>98 | Patient<br>1_1907<br>21 |

|         |               |            |     |         |                    |            |                |    |                               |                          |                                   |              |                  |                 |          |                         |
|---------|---------------|------------|-----|---------|--------------------|------------|----------------|----|-------------------------------|--------------------------|-----------------------------------|--------------|------------------|-----------------|----------|-------------------------|
| B.1.1.7 | 28<br>28<br>0 | GAT        | CTA | MN<br>P | Homo<br>zygou<br>s | N          | QHD434<br>23.2 | 1  | c.7_9delGATinsCTA             | p.Asp3Leu                | missense_variant                  | MODE<br>RATE | 1.0              | 296<br>7.1<br>6 | 96<br>61 | Patient<br>1_1907<br>21 |
| B.1.1.7 | 28<br>88<br>1 | GGG        | AAC | MN<br>P | Homo<br>zygou<br>s | N          | QHD434<br>23.2 | 1  | c.608_610delGGGinsAAC         | p.ArgGly203L<br>ysArg    | missense_variant                  | MODE<br>RATE | 1.0              | 297<br>4.7<br>7 | 40<br>18 | Patient<br>1_1907<br>21 |
| B.1.1.7 | 28<br>97<br>7 | C          | T   | SNP     | Homo<br>zygou<br>s | N          | QHD434<br>23.2 | 1  | c.704C>T                      | p.Ser235Phe              | missense_variant                  | MODE<br>RATE | 0.9<br>975       | 294<br>8.9      | 40<br>08 | Patient<br>1_1907<br>21 |
| B.1.1.7 | 29<br>10<br>9 | C          | A   | SNP     | Homo<br>zygou<br>s | N          | QHD434<br>23.2 | 1  | c.836C>A                      | p.Pro279Gln              | missense_variant                  | MODE<br>RATE | 1.0              | 298<br>2.2<br>1 | 50<br>13 | Patient<br>1_1907<br>21 |
| B.1.1.7 | 24<br>1       | C          | T   | SNP     | Homo<br>zygou<br>s | orf1a<br>b | QHD434<br>15.1 | -1 | c.-25C>T                      | .                        | upstream_gene_varia<br>nt         | MODIF<br>IER | 1.0              | 296<br>5.3<br>9 | 12<br>28 | Patient<br>1_2607<br>21 |
| B.1.1.7 | 91<br>3       | C          | T   | SNP     | Homo<br>zygou<br>s | orf1a<br>b | QHD434<br>15.1 | 1  | c.648C>T                      | p.Ser216Ser              | synonymous_variant                | LOW          | 0.9<br>95        | 235<br>3.4<br>4 | 45<br>24 | Patient<br>1_2607<br>21 |
| B.1.1.7 | 30<br>37      | C          | T   | SNP     | Homo<br>zygou<br>s | orf1a<br>b | QHD434<br>15.1 | 1  | c.2772C>T                     | p.Phe924Phe              | synonymous_variant                | LOW          | 1.0              | 292<br>7.9<br>1 | 26<br>10 | Patient<br>1_2607<br>21 |
| B.1.1.7 | 32<br>67      | C          | T   | SNP     | Homo<br>zygou<br>s | orf1a<br>b | QHD434<br>15.1 | 1  | c.3002C>T                     | p.Thr1001Ile             | missense_variant                  | MODE<br>RATE | 0.9<br>975       | 294<br>8.8<br>4 | 15<br>80 | Patient<br>1_2607<br>21 |
| B.1.1.7 | 53<br>88      | C          | A   | SNP     | Homo<br>zygou<br>s | orf1a<br>b | QHD434<br>15.1 | 1  | c.5123C>A                     | p.Ala1708Asp             | missense_variant                  | MODE<br>RATE | 1.0              | 298<br>2.1<br>8 | 27<br>59 | Patient<br>1_2607<br>21 |
| B.1.1.7 | 59<br>86      | C          | T   | SNP     | Homo<br>zygou<br>s | orf1a<br>b | QHD434<br>15.1 | 1  | c.5721C>T                     | p.Phe1907Ph<br>e         | synonymous_variant                | LOW          | 1.0              | 296<br>7.3<br>2 | 89<br>7  | Patient<br>1_2607<br>21 |
| B.1.1.7 | 61<br>14      | C          | T   | SNP     | Homo<br>zygou<br>s | orf1a<br>b | QHD434<br>15.1 | 1  | c.5849C>T                     | p.Pro1950Leu             | missense_variant                  | MODE<br>RATE | 0.9<br>95        | 291<br>9.6<br>4 | 22<br>68 | Patient<br>1_2607<br>21 |
| B.1.1.7 | 69<br>54      | T          | C   | SNP     | Homo<br>zygou<br>s | orf1a<br>b | QHD434<br>15.1 | 1  | c.6689T>C                     | p.Ile2230Thr             | missense_variant                  | MODE<br>RATE | 1.0              | 298<br>2.2<br>1 | 13<br>38 | Patient<br>1_2607<br>21 |
| B.1.1.7 | 77<br>35      | C          | T   | SNP     | Homo<br>zygou<br>s | orf1a<br>b | QHD434<br>15.1 | 1  | c.7470C>T                     | p.Ile2490Ile             | synonymous_variant                | LOW          | 0.9<br>975       | 294<br>7.9<br>2 | 20<br>45 | Patient<br>1_2607<br>21 |
| B.1.1.7 | 11<br>28<br>7 | GTCTGGTTTT | G   | DEL     | Homo<br>zygou<br>s | orf1a<br>b | QHD434<br>15.1 | 1  | c.11023_11031delTCTG<br>GTTTT | p.Ser3675_Ph<br>e3677del | conservative_inframe<br>_deletion | MODE<br>RATE | 1.0              | 287<br>1.0<br>8 | 26<br>51 | Patient<br>1_2607<br>21 |
| B.1.1.7 | 14<br>40<br>8 | C          | T   | SNP     | Homo<br>zygou<br>s | orf1a<br>b | QHD434<br>15.1 | 2  | c.14144C>T                    | p.Pro4715Leu             | missense_variant                  | MODE<br>RATE | 0.9<br>975       | 294<br>5.0<br>6 | 11<br>07 | Patient<br>1_2607<br>21 |
| B.1.1.7 | 14<br>67<br>6 | C          | T   | SNP     | Homo<br>zygou<br>s | orf1a<br>b | QHD434<br>15.1 | 2  | c.14412C>T                    | p.Pro4804Pro             | synonymous_variant                | LOW          | 0.9<br>974<br>94 | 294<br>1.4<br>6 | 12<br>26 | Patient<br>1_2607<br>21 |
| B.1.1.7 | 15<br>27      | C          | T   | SNP     | Homo<br>zygou<br>s | orf1a<br>b | QHD434<br>15.1 | 2  | c.15015C>T                    | p.His5005His             | synonymous_variant                | LOW          | 0.9<br>975       | 294<br>8.9      | 11<br>89 | Patient<br>1_2607       |

|         |               |         |   |     |            |        |                |   |                    |                      |                                 |              |                  |                 |          |                         |
|---------|---------------|---------|---|-----|------------|--------|----------------|---|--------------------|----------------------|---------------------------------|--------------|------------------|-----------------|----------|-------------------------|
|         | 9             |         |   |     | s          |        |                |   |                    |                      |                                 |              |                  | 1               |          | 21                      |
| B.1.1.7 | 16<br>17<br>6 | T       | C | SNP | Homozygous | orf1ab | QHD434<br>15.1 | 2 | c.15912T>C         | p.Thr5304Thr         | synonymous_variant              | LOW          | 0.9<br>95        | 291<br>9.5<br>8 | 27<br>84 | Patient<br>1_2607<br>21 |
| B.1.1.7 | 16<br>39<br>1 | C       | T | SNP | Homozygous | orf1ab | QHD434<br>15.1 | 2 | c.16127C>T         | p.Ala5376Val         | missense_variant                | MODE<br>RATE | 0.9<br>899<br>75 | 285<br>7.3<br>8 | 31<br>90 | Patient<br>1_2607<br>21 |
| B.1.1.7 | 17<br>61<br>5 | A       | G | SNP | Homozygous | orf1ab | QHD434<br>15.1 | 2 | c.17351A>G         | p.Lys5784Arg         | missense_variant                | MODE<br>RATE | 0.9<br>975       | 236<br>5.4<br>3 | 24<br>68 | Patient<br>1_2607<br>21 |
| B.1.1.7 | 21<br>76<br>4 | ATACATG | A | DEL | Homozygous | S      | QHD434<br>16.1 | 1 | c.204_209delACATGT | p.His69_Val7<br>Odel | disruptive_inframe_d<br>eletion | MODE<br>RATE | 1.0              | 297<br>4.7<br>7 | 13<br>50 | Patient<br>1_2607<br>21 |
| B.1.1.7 | 21<br>86<br>7 | G       | T | SNP | Homozygous | S      | QHD434<br>16.1 | 1 | c.305G>T           | p.Arg102Ile          | missense_variant                | MODE<br>RATE | 1.0              | 298<br>2.1<br>3 | 22<br>25 | Patient<br>1_2607<br>21 |
| B.1.1.7 | 21<br>99<br>0 | TTTA    | T | DEL | Homozygous | S      | QHD434<br>16.1 | 1 | c.432_434delTTA    | p.Tyr145del          | disruptive_inframe_d<br>eletion | MODE<br>RATE | 0.9<br>974<br>68 | 290<br>6.0<br>7 | 14<br>38 | Patient<br>1_2607<br>21 |
| B.1.1.7 | 22<br>20<br>5 | G       | C | SNP | Homozygous | S      | QHD434<br>16.1 | 1 | c.643G>C           | p.Asp215His          | missense_variant                | MODE<br>RATE | 0.9<br>699<br>25 | 267<br>0.7<br>5 | 10<br>83 | Patient<br>1_2607<br>21 |
| B.1.1.7 | 22<br>89<br>9 | G       | T | SNP | Homozygous | S      | QHD434<br>16.1 | 1 | c.1337G>T          | p.Gly446Val          | missense_variant                | MODE<br>RATE | 0.9<br>674<br>19 | 263<br>5.5<br>6 | 48<br>39 | Patient<br>1_2607<br>21 |
| B.1.1.7 | 23<br>01<br>2 | G       | C | SNP | Homozygous | S      | QHD434<br>16.1 | 1 | c.1450G>C          | p.Glu484Gln          | missense_variant                | MODE<br>RATE | 1.0              | 298<br>2.2<br>1 | 25<br>46 | Patient<br>1_2607<br>21 |
| B.1.1.7 | 23<br>04<br>0 | A       | G | SNP | Homozygous | S      | QHD434<br>16.1 | 1 | c.1478A>G          | p.Gln493Arg          | missense_variant                | MODE<br>RATE | 0.9<br>924<br>81 | 288<br>5.0<br>9 | 26<br>04 | Patient<br>1_2607<br>21 |
| B.1.1.7 | 23<br>06<br>3 | A       | T | SNP | Homozygous | S      | QHD434<br>16.1 | 1 | c.1501A>T          | p.Asn501Tyr          | missense_variant                | MODE<br>RATE | 0.9<br>975       | 294<br>8.1<br>7 | 78<br>7  | Patient<br>1_2607<br>21 |
| B.1.1.7 | 23<br>27<br>1 | C       | A | SNP | Homozygous | S      | QHD434<br>16.1 | 1 | c.1709C>A          | p.Ala570Asp          | missense_variant                | MODE<br>RATE | 0.9<br>975       | 294<br>8.7<br>9 | 29<br>08 | Patient<br>1_2607<br>21 |
| B.1.1.7 | 23<br>40<br>3 | A       | G | SNP | Homozygous | S      | QHD434<br>16.1 | 1 | c.1841A>G          | p.Asp614Gly          | missense_variant                | MODE<br>RATE | 1.0              | 297<br>8.6<br>2 | 38<br>55 | Patient<br>1_2607<br>21 |
| B.1.1.7 | 23<br>60<br>4 | C       | A | SNP | Homozygous | S      | QHD434<br>16.1 | 1 | c.2042C>A          | p.Pro681His          | missense_variant                | MODE<br>RATE | 0.9<br>974<br>94 | 237<br>4.1<br>2 | 19<br>29 | Patient<br>1_2607<br>21 |
| B.1.1.7 | 23<br>70<br>9 | C       | T | SNP | Homozygous | S      | QHD434<br>16.1 | 1 | c.2147C>T          | p.Thr716Ile          | missense_variant                | MODE<br>RATE | 1.0              | 296<br>4.1<br>4 | 12<br>57 | Patient<br>1_2607<br>21 |
| B.1.1.7 | 24<br>02<br>6 | C       | T | SNP | Homozygous | S      | QHD434<br>16.1 | 1 | c.2464C>T          | p.Leu822Phe          | missense_variant                | MODE<br>RATE | 0.9<br>949<br>75 | 287<br>9.7<br>4 | 19<br>09 | Patient<br>1_2607<br>21 |

|         |               |     |     |     |            |        |                |    |                       |                   |                       |              |                  |                 |          |                         |
|---------|---------------|-----|-----|-----|------------|--------|----------------|----|-----------------------|-------------------|-----------------------|--------------|------------------|-----------------|----------|-------------------------|
| B.1.1.7 | 24<br>50<br>6 | T   | G   | SNP | Homozygous | S      | QHD434<br>16.1 | 1  | c.2944T>G             | p.Ser982Ala       | missense_variant      | MODE<br>RATE | 1.0              | 297<br>4.4<br>4 | 28<br>71 | Patient<br>1_2607<br>21 |
| B.1.1.7 | 24<br>91<br>4 | G   | C   | SNP | Homozygous | S      | QHD434<br>16.1 | 1  | c.3352G>C             | p.Asp1118His      | missense_variant      | MODE<br>RATE | 1.0              | 298<br>2.1<br>9 | 18<br>83 | Patient<br>1_2607<br>21 |
| B.1.1.7 | 26<br>73<br>0 | G   | C   | SNP | Homozygous | M      | QHD434<br>19.1 | 1  | c.208G>C              | p.Val70Leu        | missense_variant      | MODE<br>RATE | 1.0              | 298<br>2.1<br>9 | 29<br>35 | Patient<br>1_2607<br>21 |
| B.1.1.7 | 27<br>49<br>4 | C   | T   | SNP | Homozygous | ORF7a  | QHD434<br>21.1 | 1  | c.101C>T              | p.Pro34Leu        | missense_variant      | MODE<br>RATE | 0.9<br>975       | 236<br>4.4<br>2 | 12<br>51 | Patient<br>1_2607<br>21 |
| B.1.1.7 | 27<br>92<br>9 | T   | A   | SNP | Homozygous | ORF8   | QHD434<br>22.1 | 1  | c.36T>A               | p.Thr12Thr        | synonymous_variant    | LOW          | 1.0              | 298<br>2.2<br>1 | 25<br>31 | Patient<br>1_2607<br>21 |
| B.1.1.7 | 27<br>97<br>2 | C   | T   | SNP | Homozygous | ORF8   | QHD434<br>22.1 | 1  | c.79C>T               | p.Gln27*          | stop_gained           | HIGH         | 0.9<br>975       | 294<br>8.9      | 58<br>91 | Patient<br>1_2607<br>21 |
| B.1.1.7 | 28<br>04<br>8 | G   | T   | SNP | Homozygous | ORF8   | QHD434<br>22.1 | 1  | c.155G>T              | p.Arg52Ile        | missense_variant      | MODE<br>RATE | 1.0              | 298<br>2.1<br>9 | 59<br>17 | Patient<br>1_2607<br>21 |
| B.1.1.7 | 28<br>11<br>1 | A   | G   | SNP | Homozygous | ORF8   | QHD434<br>22.1 | 1  | c.218A>G              | p.Tyr73Cys        | missense_variant      | MODE<br>RATE | 1.0              | 298<br>2.2<br>1 | 33<br>80 | Patient<br>1_2607<br>21 |
| B.1.1.7 | 28<br>27<br>0 | TA  | T   | DEL | Homozygous | N      | QHD434<br>23.2 | -1 | c.-3delA              | .                 | upstream_gene_variant | MODIFIER     | 1.0              | 234<br>9.9<br>1 | 78<br>35 | Patient<br>1_2607<br>21 |
| B.1.1.7 | 28<br>28<br>0 | GAT | CTA | MNP | Homozygous | N      | QHD434<br>23.2 | 1  | c.7_9delGATinsCTA     | p.Asp3Leu         | missense_variant      | MODE<br>RATE | 1.0              | 293<br>2.0      | 78<br>02 | Patient<br>1_2607<br>21 |
| B.1.1.7 | 28<br>88<br>1 | GGG | AAC | MNP | Homozygous | N      | QHD434<br>23.2 | 1  | c.608_610delGGGinsAAC | p.ArgGly203LysArg | missense_variant      | MODE<br>RATE | 1.0              | 297<br>4.7<br>7 | 31<br>52 | Patient<br>1_2607<br>21 |
| B.1.1.7 | 28<br>97<br>7 | C   | T   | SNP | Homozygous | N      | QHD434<br>23.2 | 1  | c.704C>T              | p.Ser235Phe       | missense_variant      | MODE<br>RATE | 0.9<br>974<br>87 | 293<br>5.8<br>5 | 31<br>27 | Patient<br>1_2607<br>21 |
| B.1.1.7 | 29<br>10<br>9 | C   | A   | SNP | Homozygous | N      | QHD434<br>23.2 | 1  | c.836C>A              | p.Pro279Gln       | missense_variant      | MODE<br>RATE | 1.0              | 298<br>2.2      | 35<br>58 | Patient<br>1_2607<br>21 |
| B.1.1.7 | 24<br>1       | C   | T   | SNP | Homozygous | orf1ab | QHD434<br>15.1 | -1 | c.-25C>T              | .                 | upstream_gene_variant | MODIFIER     | 1.0              | 297<br>1.2<br>4 | 14<br>88 | Patient<br>1_0408<br>21 |
| B.1.1.7 | 91<br>3       | C   | T   | SNP | Homozygous | orf1ab | QHD434<br>15.1 | 1  | c.648C>T              | p.Ser216Ser       | synonymous_variant    | LOW          | 0.9<br>975       | 238<br>0.0<br>2 | 79<br>99 | Patient<br>1_0408<br>21 |
| B.1.1.7 | 30<br>37      | C   | T   | SNP | Homozygous | orf1ab | QHD434<br>15.1 | 1  | c.2772C>T             | p.Phe924Phe       | synonymous_variant    | LOW          | 1.0              | 295<br>2.0<br>3 | 34<br>73 | Patient<br>1_0408<br>21 |
| B.1.1.7 | 32<br>67      | C   | T   | SNP | Homozygous | orf1ab | QHD434<br>15.1 | 1  | c.3002C>T             | p.Thr1001Ile      | missense_variant      | MODE<br>RATE | 1.0              | 298<br>2.2      | 18<br>47 | Patient<br>1_0408       |

|         |       |            |   |     |              |        |            |   |                          |                      |                               |           |          |         |      |                  |
|---------|-------|------------|---|-----|--------------|--------|------------|---|--------------------------|----------------------|-------------------------------|-----------|----------|---------|------|------------------|
|         |       |            |   |     | s            |        |            |   |                          |                      |                               |           |          |         |      | 21               |
| B.1.1.7 | 5388  | C          | A | SNP | Homozygous   | orf1ab | QHD43415.1 | 1 | c.5123C>A                | p.Ala1708Asp         | missense_variant              | MODE RATE | 1.0      | 2974.75 | 4968 | Patient 1_040821 |
| B.1.1.7 | 5986  | C          | T | SNP | Homozygous   | orf1ab | QHD43415.1 | 1 | c.5721C>T                | p.Phe1907Phe         | synonymous_variant            | LOW       | 1.0      | 2962.54 | 1154 | Patient 1_040821 |
| B.1.1.7 | 6114  | C          | T | SNP | Homozygous   | orf1ab | QHD43415.1 | 1 | c.5849C>T                | p.Pro1950Leu         | missense_variant              | MODE RATE | 0.995    | 2920.13 | 4425 | Patient 1_040821 |
| B.1.1.7 | 6954  | T          | C | SNP | Homozygous   | orf1ab | QHD43415.1 | 1 | c.6689T>C                | p.Ile2230Thr         | missense_variant              | MODE RATE | 1.0      | 2958.19 | 1896 | Patient 1_040821 |
| B.1.1.7 | 7735  | C          | T | SNP | Homozygous   | orf1ab | QHD43415.1 | 1 | c.7470C>T                | p.Ile2490Ile         | synonymous_variant            | LOW       | 0.9975   | 2948.7  | 3232 | Patient 1_040821 |
| B.1.1.7 | 11287 | GTCTGGTTTT | G | DEL | Homozygous   | orf1ab | QHD43415.1 | 1 | c.11023_11031delTCTGTTTT | p.Ser3675_Phe3677del | conservative_inframe_deletion | MODE RATE | 1.0      | 2936.84 | 3856 | Patient 1_040821 |
| B.1.1.7 | 14408 | C          | T | SNP | Homozygous   | orf1ab | QHD43415.1 | 2 | c.14144C>T               | p.Pro4715Leu         | missense_variant              | MODE RATE | 0.989924 | 2840.41 | 1179 | Patient 1_040821 |
| B.1.1.7 | 14676 | C          | T | SNP | Homozygous   | orf1ab | QHD43415.1 | 2 | c.14412C>T               | p.Pro4804Pro         | synonymous_variant            | LOW       | 0.9975   | 2946.07 | 1663 | Patient 1_040821 |
| B.1.1.7 | 15279 | C          | T | SNP | Homozygous   | orf1ab | QHD43415.1 | 2 | c.15015C>T               | p.His5005His         | synonymous_variant            | LOW       | 0.995    | 2919.53 | 2810 | Patient 1_040821 |
| B.1.1.7 | 16176 | T          | C | SNP | Homozygous   | orf1ab | QHD43415.1 | 2 | c.15912T>C               | p.Thr5304Thr         | synonymous_variant            | LOW       | 0.99     | 2865.23 | 4139 | Patient 1_040821 |
| B.1.1.7 | 16391 | C          | T | SNP | Homozygous   | orf1ab | QHD43415.1 | 2 | c.16127C>T               | p.Ala5376Val         | missense_variant              | MODE RATE | 1.0      | 2982.2  | 5174 | Patient 1_040821 |
| B.1.1.7 | 17615 | A          | G | SNP | Homozygous   | orf1ab | QHD43415.1 | 2 | c.17351A>G               | p.Lys5784Arg         | missense_variant              | MODE RATE | 1.0      | 2939.73 | 3913 | Patient 1_040821 |
| B.1.1.7 | 21761 | G          | T | SNP | Heterozygous | S      | QHD43416.1 | 1 | c.199G>T                 | p.Ala67Ser           | missense_variant              | MODE RATE | 0.2125   | 135.245 | 782  | Patient 1_040821 |
| B.1.1.7 | 21764 | ATACATG    | A | DEL | Homozygous   | S      | QHD43416.1 | 1 | c.204_209delACATGT       | p.His69_Val70del     | disruptive_inframe_deletion   | MODE RATE | 1.0      | 2945.16 | 781  | Patient 1_040821 |
| B.1.1.7 | 21867 | G          | T | SNP | Homozygous   | S      | QHD43416.1 | 1 | c.305G>T                 | p.Arg102Ile          | missense_variant              | MODE RATE | 0.992481 | 2884.93 | 2634 | Patient 1_040821 |
| B.1.1.7 | 21990 | TTTA       | T | DEL | Homozygous   | S      | QHD43416.1 | 1 | c.432_434delTTA          | p.Tyr145del          | disruptive_inframe_deletion   | MODE RATE | 1.0      | 2964.73 | 2067 | Patient 1_040821 |



|         |               |   |   |     |              |       |                |   |           |              |                    |              |                  |                 |          |                         |
|---------|---------------|---|---|-----|--------------|-------|----------------|---|-----------|--------------|--------------------|--------------|------------------|-----------------|----------|-------------------------|
| B.1.1.7 | 22<br>20<br>5 | G | C | SNP | Homozygous   | S     | QHD434<br>16.1 | 1 | c.643G>C  | p.Asp215His  | missense_variant   | MODE<br>RATE | 1.0              | 298<br>2.1<br>4 | 11<br>78 | Patient<br>1_0408<br>21 |
| B.1.1.7 | 22<br>31<br>7 | G | T | SNP | Heterozygous | S     | QHD434<br>16.1 | 1 | c.755G>T  | p.Gly252Val  | missense_variant   | MODE<br>RATE | 0.6<br>925       | 110<br>5.7<br>9 | 21<br>83 | Patient<br>1_0408<br>21 |
| B.1.1.7 | 22<br>89<br>9 | G | T | SNP | Homozygous   | S     | QHD434<br>16.1 | 1 | c.1337G>T | p.Gly446Val  | missense_variant   | MODE<br>RATE | 0.9<br>774<br>44 | 272<br>2.4<br>7 | 65<br>24 | Patient<br>1_0408<br>21 |
| B.1.1.7 | 23<br>01<br>2 | G | C | SNP | Homozygous   | S     | QHD434<br>16.1 | 1 | c.1450G>C | p.Glu484Gln  | missense_variant   | MODE<br>RATE | 0.9<br>974<br>87 | 293<br>4.0<br>9 | 31<br>61 | Patient<br>1_0408<br>21 |
| B.1.1.7 | 23<br>04<br>0 | A | G | SNP | Homozygous   | S     | QHD434<br>16.1 | 1 | c.1478A>G | p.Gln493Arg  | missense_variant   | MODE<br>RATE | 0.9<br>975       | 294<br>8.8<br>9 | 32<br>15 | Patient<br>1_0408<br>21 |
| B.1.1.7 | 23<br>06<br>3 | A | T | SNP | Homozygous   | S     | QHD434<br>16.1 | 1 | c.1501A>T | p.Asn501Tyr  | missense_variant   | MODE<br>RATE | 0.9<br>95        | 291<br>9.3<br>7 | 10<br>20 | Patient<br>1_0408<br>21 |
| B.1.1.7 | 23<br>27<br>1 | C | A | SNP | Homozygous   | S     | QHD434<br>16.1 | 1 | c.1709C>A | p.Ala570Asp  | missense_variant   | MODE<br>RATE | 0.9<br>975       | 294<br>8.8<br>8 | 50<br>10 | Patient<br>1_0408<br>21 |
| B.1.1.7 | 23<br>28<br>0 | C | T | SNP | Heterozygous | S     | QHD434<br>16.1 | 1 | c.1718C>T | p.Thr573Ile  | missense_variant   | MODE<br>RATE | 0.2<br>625       | 46.<br>16       | 50<br>83 | Patient<br>1_0408<br>21 |
| B.1.1.7 | 23<br>40<br>3 | A | G | SNP | Homozygous   | S     | QHD434<br>16.1 | 1 | c.1841A>G | p.Asp614Gly  | missense_variant   | MODE<br>RATE | 1.0              | 297<br>6.7<br>8 | 58<br>36 | Patient<br>1_0408<br>21 |
| B.1.1.7 | 23<br>60<br>4 | C | A | SNP | Homozygous   | S     | QHD434<br>16.1 | 1 | c.2042C>A | p.Pro681His  | missense_variant   | MODE<br>RATE | 1.0              | 298<br>2.2<br>1 | 29<br>14 | Patient<br>1_0408<br>21 |
| B.1.1.7 | 23<br>70<br>9 | C | T | SNP | Homozygous   | S     | QHD434<br>16.1 | 1 | c.2147C>T | p.Thr716Ile  | missense_variant   | MODE<br>RATE | 1.0              | 298<br>1.7<br>1 | 15<br>52 | Patient<br>1_0408<br>21 |
| B.1.1.7 | 24<br>02<br>6 | C | T | SNP | Homozygous   | S     | QHD434<br>16.1 | 1 | c.2464C>T | p.Leu822Phe  | missense_variant   | MODE<br>RATE | 0.9<br>974<br>81 | 289<br>9.4<br>5 | 33<br>12 | Patient<br>1_0408<br>21 |
| B.1.1.7 | 24<br>50<br>6 | T | G | SNP | Homozygous   | S     | QHD434<br>16.1 | 1 | c.2944T>G | p.Ser982Ala  | missense_variant   | MODE<br>RATE | 0.9<br>974<br>94 | 294<br>2.5<br>3 | 37<br>56 | Patient<br>1_0408<br>21 |
| B.1.1.7 | 24<br>91<br>4 | G | C | SNP | Homozygous   | S     | QHD434<br>16.1 | 1 | c.3352G>C | p.Asp1118His | missense_variant   | MODE<br>RATE | 0.9<br>975       | 294<br>8.9<br>3 | 18<br>74 | Patient<br>1_0408<br>21 |
| B.1.1.7 | 26<br>73<br>0 | G | C | SNP | Homozygous   | M     | QHD434<br>19.1 | 1 | c.208G>C  | p.Val70Leu   | missense_variant   | MODE<br>RATE | 1.0              | 298<br>2.1<br>8 | 37<br>63 | Patient<br>1_0408<br>21 |
| B.1.1.7 | 27<br>49<br>4 | C | T | SNP | Homozygous   | ORF7a | QHD434<br>21.1 | 1 | c.101C>T  | p.Pro34Leu   | missense_variant   | MODE<br>RATE | 0.9<br>9         | 286<br>5.5<br>6 | 11<br>56 | Patient<br>1_0408<br>21 |
| B.1.1.7 | 27<br>92      | T | A | SNP | Homozygous   | ORF8  | QHD434<br>22.1 | 1 | c.36T>A   | p.Thr12Thr   | synonymous_variant | LOW          | 0.9<br>975       | 294<br>8.9      | 35<br>39 | Patient<br>1_0408       |

|                       |               |     |     |     |            |        |                |    |                       |                   |                       |              |                  |                 |          |                         |
|-----------------------|---------------|-----|-----|-----|------------|--------|----------------|----|-----------------------|-------------------|-----------------------|--------------|------------------|-----------------|----------|-------------------------|
|                       | 9             |     |     |     | s          |        |                |    |                       |                   |                       |              |                  |                 |          | 21                      |
| B.1.1.7               | 27<br>97<br>2 | C   | T   | SNP | Homozygous | ORF8   | QHD434<br>22.1 | 1  | c.79C>T               | p.Gln27*          | stop_gained           | HIGH         | 1.0              | 296<br>0.0<br>4 | 74<br>16 | Patient<br>1_0408<br>21 |
| B.1.1.7               | 28<br>04<br>8 | G   | T   | SNP | Homozygous | ORF8   | QHD434<br>22.1 | 1  | c.155G>T              | p.Arg52Ile        | missense_variant      | MODE<br>RATE | 0.9<br>95        | 291<br>9.8<br>5 | 74<br>59 | Patient<br>1_0408<br>21 |
| B.1.1.7               | 28<br>11<br>1 | A   | G   | SNP | Homozygous | ORF8   | QHD434<br>22.1 | 1  | c.218A>G              | p.Tyr73Cys        | missense_variant      | MODE<br>RATE | 0.9<br>95        | 291<br>9.6<br>6 | 39<br>08 | Patient<br>1_0408<br>21 |
| B.1.1.7               | 28<br>27<br>0 | TA  | T   | DEL | Homozygous | N      | QHD434<br>23.2 | -1 | c.-3delA              | .                 | upstream_gene_variant | MODIF<br>IER | 1.0              | 226<br>7.4<br>1 | 92<br>30 | Patient<br>1_0408<br>21 |
| B.1.1.7               | 28<br>28<br>0 | GAT | CTA | MNP | Homozygous | N      | QHD434<br>23.2 | 1  | c.7_9delGATinsCTA     | p.Asp3Leu         | missense_variant      | MODE<br>RATE | 1.0              | 296<br>4.7<br>8 | 91<br>97 | Patient<br>1_0408<br>21 |
| B.1.1.7               | 28<br>88<br>1 | GGG | AAC | MNP | Homozygous | N      | QHD434<br>23.2 | 1  | c.608_610delGGGinsAAC | p.ArgGly203LysArg | missense_variant      | MODE<br>RATE | 1.0              | 293<br>4.1<br>2 | 36<br>96 | Patient<br>1_0408<br>21 |
| B.1.1.7               | 28<br>97<br>7 | C   | T   | SNP | Homozygous | N      | QHD434<br>23.2 | 1  | c.704C>T              | p.Ser235Phe       | missense_variant      | MODE<br>RATE | 1.0              | 298<br>2.2<br>1 | 36<br>79 | Patient<br>1_0408<br>21 |
| B.1.1.7               | 29<br>10<br>9 | C   | A   | SNP | Homozygous | N      | QHD434<br>23.2 | 1  | c.836C>A              | p.Pro279Gln       | missense_variant      | MODE<br>RATE | 1.0              | 298<br>2.2      | 28<br>40 | Patient<br>1_0408<br>21 |
| B.1.1.52<br>(BA.1.17) | 24<br>1       | C   | T   | SNP | Homozygous | orf1ab | QHD434<br>15.1 | -1 | c.-25C>T              | .                 | upstream_gene_variant | MODIF<br>IER | 1.0              | 297<br>6.2      | 31<br>31 | Patient<br>2_2101<br>22 |
| B.1.1.52<br>(BA.1.17) | 28<br>32      | A   | G   | SNP | Homozygous | orf1ab | QHD434<br>15.1 | 1  | c.2567A>G             | p.Lys856Arg       | missense_variant      | MODE<br>RATE | 0.9<br>975       | 294<br>8.6<br>5 | 70<br>46 | Patient<br>2_2101<br>22 |
| B.1.1.52<br>(BA.1.17) | 30<br>37      | C   | T   | SNP | Homozygous | orf1ab | QHD434<br>15.1 | 1  | c.2772C>T             | p.Phe924Phe       | synonymous_variant    | LOW          | 1.0              | 294<br>7.1<br>2 | 79<br>11 | Patient<br>2_2101<br>22 |
| B.1.1.52<br>(BA.1.17) | 53<br>86      | T   | G   | SNP | Homozygous | orf1ab | QHD434<br>15.1 | 1  | c.5121T>G             | p.Ala1707Ala      | synonymous_variant    | LOW          | 0.9<br>975       | 294<br>8.8<br>8 | 50<br>69 | Patient<br>2_2101<br>22 |
| B.1.1.52<br>(BA.1.17) | 56<br>72      | C   | T   | SNP | Homozygous | orf1ab | QHD434<br>15.1 | 1  | c.5407C>T             | p.Pro1803Ser      | missense_variant      | MODE<br>RATE | 0.9<br>95        | 291<br>9.6<br>6 | 32<br>92 | Patient<br>2_2101<br>22 |
| B.1.1.52<br>(BA.1.17) | 59<br>24      | G   | A   | SNP | Homozygous | orf1ab | QHD434<br>15.1 | 1  | c.5659G>A             | p.Val1887Ile      | missense_variant      | MODE<br>RATE | 0.9<br>949<br>87 | 291<br>2.0<br>6 | 49<br>95 | Patient<br>2_2101<br>22 |

|                     |       |            |     |       |            |        |            |   |                             |                            |                                              |           |          |         |      |                  |
|---------------------|-------|------------|-----|-------|------------|--------|------------|---|-----------------------------|----------------------------|----------------------------------------------|-----------|----------|---------|------|------------------|
| B.1.1.529 (BA.1.17) | 6512  | AGTT       | A   | DEL   | Homozygous | orf1ab | QHD43415.1 | 1 | c.6248_6250delGTT           | p.Ser2083_Leu2084delinslle | disruptive_inframe_deletion                  | MODE RATE | 1.0      | 2956.94 | 4309 | Patient 2_210122 |
| B.1.1.529 (BA.1.17) | 8393  | G          | A   | SNP   | Homozygous | orf1ab | QHD43415.1 | 1 | c.8128G>A                   | p.Ala2710Thr               | missense_variant                             | MODE RATE | 1.0      | 2982.21 | 5441 | Patient 2_210122 |
| B.1.1.529 (BA.1.17) | 10029 | C          | T   | SNP   | Homozygous | orf1ab | QHD43415.1 | 1 | c.9764C>T                   | p.Thr3255Ile               | missense_variant                             | MODE RATE | 1.0      | 2982.2  | 6038 | Patient 2_210122 |
| B.1.1.529 (BA.1.17) | 10449 | C          | A   | SNP   | Homozygous | orf1ab | QHD43415.1 | 1 | c.10184C>A                  | p.Pro3395His               | missense_variant                             | MODE RATE | 0.995    | 2354.22 | 3438 | Patient 2_210122 |
| B.1.1.529 (BA.1.17) | 11282 | AGTTTGTCTG | A   | DEL   | Homozygous | orf1ab | QHD43415.1 | 1 | c.11022_11030delGTCTGGTTT   | p.Leu3674_Gly3676del       | disruptive_inframe_deletion                  | MODE RATE | 1.0      | 2935.03 | 7161 | Patient 2_210122 |
| B.1.1.529 (BA.1.17) | 11537 | A          | G   | SNP   | Homozygous | orf1ab | QHD43415.1 | 1 | c.11272A>G                  | p.Ile3758Val               | missense_variant                             | MODE RATE | 1.0      | 2982.1  | 4840 | Patient 2_210122 |
| B.1.1.529 (BA.1.17) | 13195 | T          | C   | SNP   | Homozygous | orf1ab | QHD43415.1 | 1 | c.12930T>C                  | p.Val4310Val               | synonymous_variant                           | LOW       | 1.0      | 2982.18 | 5986 | Patient 2_210122 |
| B.1.1.529 (BA.1.17) | 14408 | C          | T   | SNP   | Homozygous | orf1ab | QHD43415.1 | 2 | c.14144C>T                  | p.Pro4715Leu               | missense_variant                             | MODE RATE | 1.0      | 2977.38 | 2475 | Patient 2_210122 |
| B.1.1.529 (BA.1.17) | 15240 | C          | T   | SNP   | Homozygous | orf1ab | QHD43415.1 | 2 | c.14976C>T                  | p.Asn4992Asn               | synonymous_variant                           | LOW       | 1.0      | 2976.85 | 5216 | Patient 2_210122 |
| B.1.1.529 (BA.1.17) | 18163 | A          | G   | SNP   | Homozygous | orf1ab | QHD43415.1 | 2 | c.17899A>G                  | p.Ile5967Val               | missense_variant                             | MODE RATE | 1.0      | 2982.16 | 3049 | Patient 2_210122 |
| B.1.1.529 (BA.1.17) | 19374 | C          | T   | SNP   | Homozygous | orf1ab | QHD43415.1 | 2 | c.19110C>T                  | p.Phe6370Phe               | synonymous_variant                           | LOW       | 0.997494 | 2903.41 | 3347 | Patient 2_210122 |
| B.1.1.529 (BA.1.17) | 21762 | CTATACATG  | TTA | MIXED | Homozygous | S      | QHD43416.1 | 1 | c.200_208delCTATACATGinsTTA | p.Ala67_Val70delinsVallle  | missense_variant&disruptive_inframe_deletion | MODE RATE | 1.0      | 2945.09 | 3538 | Patient 2_210122 |
| B.1.1.529 (BA.1.17) | 21986 | GGTGTATT   | G   | DEL   | Homozygous | S      | QHD43416.1 | 1 | c.425_433delGTGTTTATT       | p.Gly142_Tyr145delinsAsp   | disruptive_inframe_deletion                  | MODE RATE | 1.0      | 527.588 | 70   | Patient 2_210122 |

|                     |       |      |            |     |            |   |            |   |                           |                             |                              |           |          |         |      |                  |
|---------------------|-------|------|------------|-----|------------|---|------------|---|---------------------------|-----------------------------|------------------------------|-----------|----------|---------|------|------------------|
| )                   |       |      |            |     |            |   |            |   |                           |                             |                              |           |          |         |      |                  |
| B.1.1.529 (BA.1.17) | 22193 | AATT | A          | DEL | Homozygous | S | QHD43416.1 | 1 | c.632_634delATT           | p.Asn211_Leu212delinsIle    | disruptive_inframe_deletion  | MODE RATE | 1.0      | 2968.15 | 3399 | Patient 2_210122 |
| B.1.1.529 (BA.1.17) | 22204 | T    | TGAGCCAGAA | INS | Homozygous | S | QHD43416.1 | 1 | c.644_645insGCCAGAAGA     | p.Arg214_Asp215insGluProGlu | disruptive_inframe_insertion | MODE RATE | 0.979899 | 2745.59 | 3409 | Patient 2_210122 |
| B.1.1.529 (BA.1.17) | 22578 | G    | A          | SNP | Homozygous | S | QHD43416.1 | 1 | c.1016G>A                 | p.Gly339Asp                 | missense_variant             | MODE RATE | 0.997494 | 2941.48 | 4924 | Patient 2_210122 |
| B.1.1.529 (BA.1.17) | 22673 | TC   | CT         | MNP | Homozygous | S | QHD43416.1 | 1 | c.1111_1112delTCinsCT     | p.Ser371Leu                 | missense_variant             | MODE RATE | 0.992443 | 2846.85 | 2806 | Patient 2_210122 |
| B.1.1.529 (BA.1.17) | 22679 | T    | C          | SNP | Homozygous | S | QHD43416.1 | 1 | c.1117T>C                 | p.Ser373Pro                 | missense_variant             | MODE RATE | 0.9975   | 2948.15 | 2815 | Patient 2_210122 |
| B.1.1.529 (BA.1.17) | 22686 | C    | T          | SNP | Homozygous | S | QHD43416.1 | 1 | c.1124C>T                 | p.Ser375Phe                 | missense_variant             | MODE RATE | 0.997494 | 2908.37 | 1667 | Patient 2_210122 |
| B.1.1.529 (BA.1.17) | 22813 | G    | T          | SNP | Homozygous | S | QHD43416.1 | 1 | c.1251G>T                 | p.Lys417Asn                 | missense_variant             | MODE RATE | 1.0      | 2982.14 | 6858 | Patient 2_210122 |
| B.1.1.529 (BA.1.17) | 22882 | T    | G          | SNP | Homozygous | S | QHD43416.1 | 1 | c.1320T>G                 | p.Asn440Lys                 | missense_variant             | MODE RATE | 1.0      | 2982.2  | 1119 | Patient 2_210122 |
| B.1.1.529 (BA.1.17) | 22898 | G    | A          | SNP | Homozygous | S | QHD43416.1 | 1 | c.1336G>A                 | p.Gly446Ser                 | missense_variant             | MODE RATE | 0.997494 | 2940.33 | 1123 | Patient 2_210122 |
| B.1.1.529 (BA.1.17) | 22992 | GCAC | ACAA       | MNP | Homozygous | S | QHD43416.1 | 1 | c.1430_1433delGCACinsACAA | p.SerThr477AsnLys           | missense_variant             | MODE RATE | 1.0      | 2969.73 | 6162 | Patient 2_210122 |
| B.1.1.529 (BA.1.17) | 23013 | A    | C          | SNP | Homozygous | S | QHD43416.1 | 1 | c.1451A>C                 | p.Glu484Ala                 | missense_variant             | MODE RATE | 1.0      | 2949.67 | 6140 | Patient 2_210122 |
| B.1.1.529 (BA.1.17) | 23040 | A    | G          | SNP | Homozygous | S | QHD43416.1 | 1 | c.1478A>G                 | p.Gln493Arg                 | missense_variant             | MODE RATE | 1.0      | 2842.59 | 6043 | Patient 2_210122 |

|                     |       |   |   |     |            |   |            |   |           |              |                    |           |          |         |       |                  |
|---------------------|-------|---|---|-----|------------|---|------------|---|-----------|--------------|--------------------|-----------|----------|---------|-------|------------------|
| B.1.1.529 (BA.1.17) | 23202 | C | A | SNP | Homozygous | S | QHD43416.1 | 1 | c.1640C>A | p.Thr547Lys  | missense_variant   | MODE RATE | 1.0      | 2975.02 | 2046  | Patient 2_210122 |
| B.1.1.529 (BA.1.17) | 23403 | A | G | SNP | Homozygous | S | QHD43416.1 | 1 | c.1841A>G | p.Asp614Gly  | missense_variant   | MODE RATE | 1.0      | 2981.97 | 8906  | Patient 2_210122 |
| B.1.1.529 (BA.1.17) | 23422 | C | T | SNP | Homozygous | S | QHD43416.1 | 1 | c.1860C>T | p.Val620Val  | synonymous_variant | LOW       | 0.997487 | 2936.38 | 8940  | Patient 2_210122 |
| B.1.1.529 (BA.1.17) | 23525 | C | T | SNP | Homozygous | S | QHD43416.1 | 1 | c.1963C>T | p.His655Tyr  | missense_variant   | MODE RATE | 0.995    | 2919.61 | 9963  | Patient 2_210122 |
| B.1.1.529 (BA.1.17) | 23599 | T | G | SNP | Homozygous | S | QHD43416.1 | 1 | c.2037T>G | p.Asn679Lys  | missense_variant   | MODE RATE | 1.0      | 2974.75 | 7837  | Patient 2_210122 |
| B.1.1.529 (BA.1.17) | 23604 | C | A | SNP | Homozygous | S | QHD43416.1 | 1 | c.2042C>A | p.Pro681His  | missense_variant   | MODE RATE | 1.0      | 2974.76 | 7841  | Patient 2_210122 |
| B.1.1.529 (BA.1.17) | 23854 | C | A | SNP | Homozygous | S | QHD43416.1 | 1 | c.2292C>A | p.Asn764Lys  | missense_variant   | MODE RATE | 1.0      | 2974.42 | 4308  | Patient 2_210122 |
| B.1.1.529 (BA.1.17) | 23948 | G | T | SNP | Homozygous | S | QHD43416.1 | 1 | c.2386G>T | p.Asp796Tyr  | missense_variant   | MODE RATE | 1.0      | 2974.75 | 2591  | Patient 2_210122 |
| B.1.1.529 (BA.1.17) | 24130 | C | A | SNP | Homozygous | S | QHD43416.1 | 1 | c.2568C>A | p.Asn856Lys  | missense_variant   | MODE RATE | 1.0      | 2961.13 | 4250  | Patient 2_210122 |
| B.1.1.529 (BA.1.17) | 24424 | A | T | SNP | Homozygous | S | QHD43416.1 | 1 | c.2862A>T | p.Gln954His  | missense_variant   | MODE RATE | 0.997494 | 2373.79 | 3921  | Patient 2_210122 |
| B.1.1.529 (BA.1.17) | 24469 | T | A | SNP | Homozygous | S | QHD43416.1 | 1 | c.2907T>A | p.Asn969Lys  | missense_variant   | MODE RATE | 0.994987 | 2910.7  | 10275 | Patient 2_210122 |
| B.1.1.529 (BA.1.17) | 24503 | C | T | SNP | Homozygous | S | QHD43416.1 | 1 | c.2941C>T | p.Leu981Phe  | missense_variant   | MODE RATE | 0.9875   | 2277.74 | 10469 | Patient 2_210122 |
| B.1.1.529 (BA.1.17) | 25000 | C | T | SNP | Homozygous | S | QHD43416.1 | 1 | c.3438C>T | p.Asp1146Asp | synonymous_variant | LOW       | 1.0      | 2951.59 | 7061  | Patient 2_210122 |

|                     |       |            |     |     |            |        |            |    |                       |                   |                             |           |          |         |       |                  |  |
|---------------------|-------|------------|-----|-----|------------|--------|------------|----|-----------------------|-------------------|-----------------------------|-----------|----------|---------|-------|------------------|--|
| )                   |       |            |     |     |            |        |            |    |                       |                   |                             |           |          |         |       |                  |  |
| B.1.1.529 (BA.1.17) | 25584 | C          | T   | SNP | Homozygous | ORF3a  | QHD43417.1 | 1  | c.192C>T              | p.Thr64Thr        | synonymous_variant          | LOW       | 0.9975   | 2948.9  | 5551  | Patient 2_210122 |  |
| B.1.1.529 (BA.1.17) | 26270 | C          | T   | SNP | Homozygous | E      | QHD43418.1 | 1  | c.26C>T               | p.Thr9Ile         | missense_variant            | MODE RATE | 1.0      | 2982.15 | 14153 | Patient 2_210122 |  |
| B.1.1.529 (BA.1.17) | 26530 | A          | G   | SNP | Homozygous | M      | QHD43419.1 | 1  | c.8A>G                | p.Asp3Gly         | missense_variant            | MODE RATE | 1.0      | 2982.21 | 3554  | Patient 2_210122 |  |
| B.1.1.529 (BA.1.17) | 26577 | C          | G   | SNP | Homozygous | M      | QHD43419.1 | 1  | c.55C>G               | p.Gln19Glu        | missense_variant            | MODE RATE | 0.997494 | 2932.22 | 1603  | Patient 2_210122 |  |
| B.1.1.529 (BA.1.17) | 26709 | G          | A   | SNP | Homozygous | M      | QHD43419.1 | 1  | c.187G>A              | p.Ala63Thr        | missense_variant            | MODE RATE | 0.9975   | 2948.9  | 4185  | Patient 2_210122 |  |
| B.1.1.529 (BA.1.17) | 27259 | A          | C   | SNP | Homozygous | ORF6   | QHD43420.1 | 1  | c.58A>C               | p.Arg20Arg        | synonymous_variant          | LOW       | 1.0      | 2959.3  | 6686  | Patient 2_210122 |  |
| B.1.1.529 (BA.1.17) | 27807 | C          | T   | SNP | Homozygous | ORF8   | QHD43422.1 | -1 | c.-87C>T              | .                 | upstream_gene_variant       | MODIFIER  | 1.0      | 2982.21 | 6873  | Patient 2_210122 |  |
| B.1.1.529 (BA.1.17) | 28271 | A          | T   | SNP | Homozygous | N      | QHD43423.2 | -1 | c.-3A>T               | .                 | upstream_gene_variant       | MODIFIER  | 0.9825   | 2795.94 | 15309 | Patient 2_210122 |  |
| B.1.1.529 (BA.1.17) | 28311 | C          | T   | SNP | Homozygous | N      | QHD43423.2 | 1  | c.38C>T               | p.Pro13Leu        | missense_variant            | MODE RATE | 0.995    | 2352.54 | 15320 | Patient 2_210122 |  |
| B.1.1.529 (BA.1.17) | 28361 | GGAGAACGCA | G   | DEL | Homozygous | N      | QHD43423.2 | 1  | c.90_98delAGAACGCAG   | p.Glu31_Ser33del  | disruptive_inframe_deletion | MODE RATE | 1.0      | 2922.71 | 4701  | Patient 2_210122 |  |
| B.1.1.529 (BA.1.17) | 28881 | GGG        | AAC | MNP | Homozygous | N      | QHD43423.2 | 1  | c.608_610delGGGinsAAC | p.ArgGly203LysArg | missense_variant            | MODE RATE | 1.0      | 2934.8  | 3726  | Patient 2_210122 |  |
| B.1.1.529 (BA.1.17) | 241   | C          | T   | SNP | Homozygous | orf1ab | QHD43415.1 | -1 | c.-25C>T              | .                 | upstream_gene_variant       | MODIFIER  | 1.0      | 2968.2  | 2082  | Patient 2_120222 |  |

|                        |       |            |   |     |            |        |            |   |                           |                            |                             |           |          |         |      |                  |
|------------------------|-------|------------|---|-----|------------|--------|------------|---|---------------------------|----------------------------|-----------------------------|-----------|----------|---------|------|------------------|
| B.1.1.529<br>(BA.1.17) | 2832  | A          | G | SNP | Homozygous | orf1ab | QHD43415.1 | 1 | c.2567A>G                 | p.Lys856Arg                | missense_variant            | MODE RATE | 1.0      | 2974.58 | 5146 | Patient 2_120222 |
| B.1.1.529<br>(BA.1.17) | 3037  | C          | T | SNP | Homozygous | orf1ab | QHD43415.1 | 1 | c.2772C>T                 | p.Phe924Phe                | synonymous_variant          | LOW       | 0.9975   | 2921.48 | 4934 | Patient 2_120222 |
| B.1.1.529<br>(BA.1.17) | 5386  | T          | G | SNP | Homozygous | orf1ab | QHD43415.1 | 1 | c.5121T>G                 | p.Ala1707Ala               | synonymous_variant          | LOW       | 1.0      | 2974.76 | 3829 | Patient 2_120222 |
| B.1.1.529<br>(BA.1.17) | 5672  | C          | T | SNP | Homozygous | orf1ab | QHD43415.1 | 1 | c.5407C>T                 | p.Pro1803Ser               | missense_variant            | MODE RATE | 0.987469 | 2833.04 | 3851 | Patient 2_120222 |
| B.1.1.529<br>(BA.1.17) | 5924  | G          | A | SNP | Homozygous | orf1ab | QHD43415.1 | 1 | c.5659G>A                 | p.Val1887Ile               | missense_variant            | MODE RATE | 0.9975   | 2933.23 | 3515 | Patient 2_120222 |
| B.1.1.529<br>(BA.1.17) | 6512  | AGTT       | A | DEL | Homozygous | orf1ab | QHD43415.1 | 1 | c.6248_6250delGTT         | p.Ser2083_Leu2084delinslle | disruptive_inframe_deletion | MODE RATE | 1.0      | 2928.82 | 1980 | Patient 2_120222 |
| B.1.1.529<br>(BA.1.17) | 8393  | G          | A | SNP | Homozygous | orf1ab | QHD43415.1 | 1 | c.8128G>A                 | p.Ala2710Thr               | missense_variant            | MODE RATE | 1.0      | 2982.16 | 3835 | Patient 2_120222 |
| B.1.1.529<br>(BA.1.17) | 10029 | C          | T | SNP | Homozygous | orf1ab | QHD43415.1 | 1 | c.9764C>T                 | p.Thr3255Ile               | missense_variant            | MODE RATE | 0.997487 | 2922.63 | 3766 | Patient 2_120222 |
| B.1.1.529<br>(BA.1.17) | 10449 | C          | A | SNP | Homozygous | orf1ab | QHD43415.1 | 1 | c.10184C>A                | p.Pro3395His               | missense_variant            | MODE RATE | 0.997436 | 2875.65 | 2078 | Patient 2_120222 |
| B.1.1.529<br>(BA.1.17) | 11282 | AGTTTGTCTG | A | DEL | Homozygous | orf1ab | QHD43415.1 | 1 | c.11022_11030delGTCTGGTTT | p.Leu3674_Gly3676del       | disruptive_inframe_deletion | MODE RATE | 1.0      | 2917.49 | 3599 | Patient 2_120222 |
| B.1.1.529<br>(BA.1.17) | 11537 | A          | G | SNP | Homozygous | orf1ab | QHD43415.1 | 1 | c.11272A>G                | p.Ile3758Val               | missense_variant            | MODE RATE | 1.0      | 2981.64 | 3784 | Patient 2_120222 |
| B.1.1.529<br>(BA.1.17) | 13195 | T          | C | SNP | Homozygous | orf1ab | QHD43415.1 | 1 | c.12930T>C                | p.Val4310Val               | synonymous_variant          | LOW       | 1.0      | 2982.17 | 6090 | Patient 2_120222 |
| B.1.1.529<br>(BA.1.17) | 14408 | C          | T | SNP | Homozygous | orf1ab | QHD43415.1 | 2 | c.14144C>T                | p.Pro4715Leu               | missense_variant            | MODE RATE | 0.997494 | 2941.47 | 3242 | Patient 2_120222 |

|                        |       |           |            |       |              |        |            |   |                             |                             |                                              |           |          |         |      |                  |
|------------------------|-------|-----------|------------|-------|--------------|--------|------------|---|-----------------------------|-----------------------------|----------------------------------------------|-----------|----------|---------|------|------------------|
| )                      |       |           |            |       |              |        |            |   |                             |                             |                                              |           |          |         |      |                  |
| B.1.1.529<br>(BA.1.17) | 15240 | C         | T          | SNP   | Homozygous   | orf1ab | QHD43415.1 | 2 | c.14976C>T                  | p.Asn4992Asn                | synonymous_variant                           | LOW       | 1.0      | 2980.31 | 6673 | Patient 2_120222 |
| B.1.1.529<br>(BA.1.17) | 18163 | A         | G          | SNP   | Homozygous   | orf1ab | QHD43415.1 | 2 | c.17899A>G                  | p.Ile5967Val                | missense_variant                             | MODE RATE | 1.0      | 2974.76 | 3093 | Patient 2_120222 |
| B.1.1.529<br>(BA.1.17) | 19374 | C         | T          | SNP   | Homozygous   | orf1ab | QHD43415.1 | 2 | c.19110C>T                  | p.Phe6370Phe                | synonymous_variant                           | LOW       | 1.0      | 2906.16 | 3145 | Patient 2_120222 |
| B.1.1.529<br>(BA.1.17) | 21762 | CTATACATG | TTA        | MIXED | Homozygous   | S      | QHD43416.1 | 1 | c.200_208delCTATACATGinsTTA | p.Ala67_Val70delinsValle    | missense_variant&disruptive_inframe_deletion | MODE RATE | 1.0      | 2913.03 | 2299 | Patient 2_120222 |
| B.1.1.529<br>(BA.1.17) | 22193 | AATT      | A          | DEL   | Homozygous   | S      | QHD43416.1 | 1 | c.632_634delATT             | p.Asn211_Leu212delinsIle    | disruptive_inframe_deletion                  | MODE RATE | 1.0      | 2974.73 | 2707 | Patient 2_120222 |
| B.1.1.529<br>(BA.1.17) | 22204 | T         | TGAGCCAGAA | INS   | Homozygous   | S      | QHD43416.1 | 1 | c.644_645insGCCAGAAGA       | p.Arg214_Asp215insGluProGlu | disruptive_inframe_insertion                 | MODE RATE | 0.98975  | 2851.81 | 2713 | Patient 2_120222 |
| B.1.1.529<br>(BA.1.17) | 22578 | G         | A          | SNP   | Homozygous   | S      | QHD43416.1 | 1 | c.1016G>A                   | p.Gly339Asp                 | missense_variant                             | MODE RATE | 1.0      | 2974.78 | 1210 | Patient 2_120222 |
| B.1.1.529<br>(BA.1.17) | 22581 | A         | C          | SNP   | Homozygous   | S      | QHD43416.1 | 1 | c.1019A>C                   | p.Glu340Ala                 | missense_variant                             | MODE RATE | 0.90974  | 1719.65 | 251  | Patient 2_120222 |
| B.1.1.529<br>(BA.1.17) | 22582 | A         | C          | SNP   | Heterozygous | S      | QHD43416.1 | 1 | c.1020A>C                   | p.Glu340Asp                 | missense_variant                             | MODE RATE | 0.410359 | 791.641 | 251  | Patient 2_120222 |
| B.1.1.529<br>(BA.1.17) | 22673 | TC        | CT         | MNP   | Homozygous   | S      | QHD43416.1 | 1 | c.1111_1112delTCinsCT       | p.Ser371Leu                 | missense_variant                             | MODE RATE | 0.994975 | 2905.1  | 1413 | Patient 2_120222 |
| B.1.1.529<br>(BA.1.17) | 22679 | T         | C          | SNP   | Homozygous   | S      | QHD43416.1 | 1 | c.1117T>C                   | p.Ser373Pro                 | missense_variant                             | MODE RATE | 1.0      | 2980.21 | 1416 | Patient 2_120222 |
| B.1.1.529<br>(BA.1.17) | 22686 | C         | T          | SNP   | Homozygous   | S      | QHD43416.1 | 1 | c.1124C>T                   | p.Ser375Phe                 | missense_variant                             | MODE RATE | 0.992481 | 2847.84 | 1117 | Patient 2_120222 |



|                     |       |      |      |     |            |   |            |   |                           |                   |                    |           |          |         |      |                  |
|---------------------|-------|------|------|-----|------------|---|------------|---|---------------------------|-------------------|--------------------|-----------|----------|---------|------|------------------|
| B.1.1.529 (BA.1.17) | 22813 | G    | T    | SNP | Homozygous | S | QHD43416.1 | 1 | c.1251G>T                 | p.Lys417Asn       | missense_variant   | MODE RATE | 1.0      | 2982.17 | 4197 | Patient 2_120222 |
| B.1.1.529 (BA.1.17) | 22882 | T    | G    | SNP | Homozygous | S | QHD43416.1 | 1 | c.1320T>G                 | p.Asn440Lys       | missense_variant   | MODE RATE | 1.0      | 2974.77 | 5223 | Patient 2_120222 |
| B.1.1.529 (BA.1.17) | 22898 | G    | A    | SNP | Homozygous | S | QHD43416.1 | 1 | c.1336G>A                 | p.Gly446Ser       | missense_variant   | MODE RATE | 0.9975   | 2948.75 | 5208 | Patient 2_120222 |
| B.1.1.529 (BA.1.17) | 22992 | GCAC | ACAA | MNP | Homozygous | S | QHD43416.1 | 1 | c.1430_1433delGCACinsACAA | p.SerThr477AsnLys | missense_variant   | MODE RATE | 1.0      | 2928.64 | 2214 | Patient 2_120222 |
| B.1.1.529 (BA.1.17) | 23013 | A    | C    | SNP | Homozygous | S | QHD43416.1 | 1 | c.1451A>C                 | p.Glu484Ala       | missense_variant   | MODE RATE | 1.0      | 2972.43 | 2208 | Patient 2_120222 |
| B.1.1.529 (BA.1.17) | 23040 | A    | G    | SNP | Homozygous | S | QHD43416.1 | 1 | c.1478A>G                 | p.Gln493Arg       | missense_variant   | MODE RATE | 0.971649 | 2612.37 | 2134 | Patient 2_120222 |
| B.1.1.529 (BA.1.17) | 23202 | C    | A    | SNP | Homozygous | S | QHD43416.1 | 1 | c.1640C>A                 | p.Thr547Lys       | missense_variant   | MODE RATE | 1.0      | 2966.75 | 2105 | Patient 2_120222 |
| B.1.1.529 (BA.1.17) | 23403 | A    | G    | SNP | Homozygous | S | QHD43416.1 | 1 | c.1841A>G                 | p.Asp614Gly       | missense_variant   | MODE RATE | 1.0      | 2972.27 | 5996 | Patient 2_120222 |
| B.1.1.529 (BA.1.17) | 23422 | C    | T    | SNP | Homozygous | S | QHD43416.1 | 1 | c.1860C>T                 | p.Val620Val       | synonymous_variant | LOW       | 0.9975   | 2948.09 | 6041 | Patient 2_120222 |
| B.1.1.529 (BA.1.17) | 23525 | C    | T    | SNP | Homozygous | S | QHD43416.1 | 1 | c.1963C>T                 | p.His655Tyr       | missense_variant   | MODE RATE | 1.0      | 2952.98 | 7904 | Patient 2_120222 |
| B.1.1.529 (BA.1.17) | 23599 | T    | G    | SNP | Homozygous | S | QHD43416.1 | 1 | c.2037T>G                 | p.Asn679Lys       | missense_variant   | MODE RATE | 1.0      | 2974.77 | 6581 | Patient 2_120222 |
| B.1.1.529 (BA.1.17) | 23604 | C    | A    | SNP | Homozygous | S | QHD43416.1 | 1 | c.2042C>A                 | p.Pro681His       | missense_variant   | MODE RATE | 0.994987 | 2346.78 | 6583 | Patient 2_120222 |
| B.1.1.529 (BA.1.17) | 23854 | C    | A    | SNP | Homozygous | S | QHD43416.1 | 1 | c.2292C>A                 | p.Asn764Lys       | missense_variant   | MODE RATE | 0.997487 | 2909.03 | 1691 | Patient 2_120222 |

|                     |       |   |   |     |            |       |            |   |           |              |                    |           |          |         |      |                  |
|---------------------|-------|---|---|-----|------------|-------|------------|---|-----------|--------------|--------------------|-----------|----------|---------|------|------------------|
| )                   |       |   |   |     |            |       |            |   |           |              |                    |           |          |         |      |                  |
| B.1.1.529 (BA.1.17) | 23948 | G | T | SNP | Homozygous | S     | QHD43416.1 | 1 | c.2386G>T | p.Asp796Tyr  | missense_variant   | MODE RATE | 1.0      | 2982.17 | 1366 | Patient 2_120222 |
| B.1.1.529 (BA.1.17) | 24130 | C | A | SNP | Homozygous | S     | QHD43416.1 | 1 | c.2568C>A | p.Asn856Lys  | missense_variant   | MODE RATE | 1.0      | 2942.62 | 2170 | Patient 2_120222 |
| B.1.1.529 (BA.1.17) | 24424 | A | T | SNP | Homozygous | S     | QHD43416.1 | 1 | c.2862A>T | p.Gln954His  | missense_variant   | MODE RATE | 0.992481 | 2320.36 | 1815 | Patient 2_120222 |
| B.1.1.529 (BA.1.17) | 24469 | T | A | SNP | Homozygous | S     | QHD43416.1 | 1 | c.2907T>A | p.Asn969Lys  | missense_variant   | MODE RATE | 0.987469 | 2792.0  | 5563 | Patient 2_120222 |
| B.1.1.529 (BA.1.17) | 24503 | C | T | SNP | Homozygous | S     | QHD43416.1 | 1 | c.2941C>T | p.Leu981Phe  | missense_variant   | MODE RATE | 0.969925 | 2670.04 | 5741 | Patient 2_120222 |
| B.1.1.529 (BA.1.17) | 25000 | C | T | SNP | Homozygous | S     | QHD43416.1 | 1 | c.3438C>T | p.Asp1146Asp | synonymous_variant | LOW       | 0.9975   | 2949.52 | 5337 | Patient 2_120222 |
| B.1.1.529 (BA.1.17) | 25584 | C | T | SNP | Homozygous | ORF3a | QHD43417.1 | 1 | c.192C>T  | p.Thr64Thr   | synonymous_variant | LOW       | 0.994975 | 2340.04 | 3717 | Patient 2_120222 |
| B.1.1.529 (BA.1.17) | 26270 | C | T | SNP | Homozygous | E     | QHD43418.1 | 1 | c.26C>T   | p.Thr9Ile    | missense_variant   | MODE RATE | 1.0      | 2982.2  | 8205 | Patient 2_120222 |
| B.1.1.529 (BA.1.17) | 26530 | A | G | SNP | Homozygous | M     | QHD43419.1 | 1 | c.8A>G    | p.Asp3Gly    | missense_variant   | MODE RATE | 1.0      | 2974.28 | 5045 | Patient 2_120222 |
| B.1.1.529 (BA.1.17) | 26577 | C | G | SNP | Homozygous | M     | QHD43419.1 | 1 | c.55C>G   | p.Gln19Glu   | missense_variant   | MODE RATE | 1.0      | 2982.17 | 2713 | Patient 2_120222 |
| B.1.1.529 (BA.1.17) | 26709 | G | A | SNP | Homozygous | M     | QHD43419.1 | 1 | c.187G>A  | p.Ala63Thr   | missense_variant   | MODE RATE | 1.0      | 2982.21 | 2992 | Patient 2_120222 |
| B.1.1.529 (BA.1.17) | 27259 | A | C | SNP | Homozygous | ORF6  | QHD43420.1 | 1 | c.58A>C   | p.Arg20Arg   | synonymous_variant | LOW       | 0.997487 | 2935.3  | 4148 | Patient 2_120222 |

|                     |       |            |     |     |              |        |            |    |                       |                   |                             |           |          |         |      |                  |
|---------------------|-------|------------|-----|-----|--------------|--------|------------|----|-----------------------|-------------------|-----------------------------|-----------|----------|---------|------|------------------|
| B.1.1.529 (BA.1.17) | 27807 | C          | T   | SNP | Homozygous   | ORF8   | QHD43422.1 | -1 | c.-87C>T              | .                 | upstream_gene_variant       | MODIFIER  | 1.0      | 2982.21 | 7088 | Patient 2_120222 |
| B.1.1.529 (BA.1.17) | 28271 | A          | T   | SNP | Homozygous   | N      | QHD43423.2 | -1 | c.-3A>T               | .                 | upstream_gene_variant       | MODIFIER  | 0.985    | 2798.84 | 7104 | Patient 2_120222 |
| B.1.1.529 (BA.1.17) | 28311 | C          | T   | SNP | Homozygous   | N      | QHD43423.2 | 1  | c.38C>T               | p.Pro13Leu        | missense_variant            | MODE RATE | 0.9775   | 2744.79 | 7093 | Patient 2_120222 |
| B.1.1.529 (BA.1.17) | 28361 | GGAGAACGCA | G   | DEL | Homozygous   | N      | QHD43423.2 | 1  | c.90_98delAGAACGCAG   | p.Glu31_Ser33del  | disruptive_inframe_deletion | MODE RATE | 1.0      | 2924.98 | 3555 | Patient 2_120222 |
| B.1.1.529 (BA.1.17) | 28881 | GGG        | AAC | MNP | Homozygous   | N      | QHD43423.2 | 1  | c.608_610delGGGinsAAC | p.ArgGly203LysArg | missense_variant            | MODE RATE | 1.0      | 2958.37 | 2792 | Patient 2_120222 |
| B.1.1.529 (BA.2)    | 44    | C          | T   | SNP | Homozygous   | orf1ab | QHD43415.1 | -1 | c.-222C>T             | .                 | upstream_gene_variant       | MODIFIER  | 1.0      | 2970.91 | 7788 | Patient 4_060522 |
| B.1.1.529 (BA.2)    | 241   | C          | T   | SNP | Homozygous   | orf1ab | QHD43415.1 | -1 | c.-25C>T              | .                 | upstream_gene_variant       | MODIFIER  | 0.997494 | 2932.67 | 527  | Patient 4_060522 |
| B.1.1.529 (BA.2)    | 670   | T          | G   | SNP | Homozygous   | orf1ab | QHD43415.1 | 1  | c.405T>G              | p.Ser135Arg       | missense_variant            | MODE RATE | 0.995    | 2919.58 | 6649 | Patient 4_060522 |
| B.1.1.529 (BA.2)    | 1738  | G          | T   | SNP | Heterozygous | orf1ab | QHD43415.1 | 1  | c.1473G>T             | p.Val491Val       | synonymous_variant          | LOW       | 0.2675   | 51.813  | 8490 | Patient 4_060522 |
| B.1.1.529 (BA.2)    | 2790  | C          | T   | SNP | Homozygous   | orf1ab | QHD43415.1 | 1  | c.2525C>T             | p.Thr842Ile       | missense_variant            | MODE RATE | 1.0      | 2915.82 | 4454 | Patient 4_060522 |
| B.1.1.529 (BA.2)    | 3037  | C          | T   | SNP | Homozygous   | orf1ab | QHD43415.1 | 1  | c.2772C>T             | p.Phe924Phe       | synonymous_variant          | LOW       | 1.0      | 2944.56 | 6099 | Patient 4_060522 |
| B.1.1.529 (BA.2)    | 4184  | G          | A   | SNP | Homozygous   | orf1ab | QHD43415.1 | 1  | c.3919G>A             | p.Gly1307Ser      | missense_variant            | MODE RATE | 0.9975   | 2948.9  | 4218 | Patient 4_060522 |
| B.1.1.529 (BA.2)    | 4321  | C          | T   | SNP | Homozygous   | orf1ab | QHD43415.1 | 1  | c.4056C>T             | p.Ala1352Ala      | synonymous_variant          | LOW       | 0.9875   | 2830.53 | 6401 | Patient 4_060522 |
| B.1.1.529 (BA.2)    | 4543  | C          | T   | SNP | Homozygous   | orf1ab | QHD43415.1 | 1  | c.4278C>T             | p.Thr1426Thr      | synonymous_variant          | LOW       | 0.9975   | 2948.9  | 9129 | Patient 4_060522 |
| B.1.1.529 (BA.2)    | 7303  | C          | T   | SNP | Homozygous   | orf1ab | QHD43415.1 | 1  | c.7038C>T             | p.Ile2346Ile      | synonymous_variant          | LOW       | 1.0      | 2982.2  | 3304 | Patient 4_060522 |

|                  |       |            |     |     |            |        |            |   |                           |                      |                               |           |          |         |      |                 |
|------------------|-------|------------|-----|-----|------------|--------|------------|---|---------------------------|----------------------|-------------------------------|-----------|----------|---------|------|-----------------|
| B.1.1.529 (BA.2) | 9344  | C          | T   | SNP | Homozygous | orf1ab | QHD43415.1 | 1 | c.9079C>T                 | p.Leu3027Phe         | missense_variant              | MODE RATE | 1.0      | 2981.48 | 5855 | Patient4_060522 |
| B.1.1.529 (BA.2) | 9424  | A          | G   | SNP | Homozygous | orf1ab | QHD43415.1 | 1 | c.9159A>G                 | p.Val3053Val         | synonymous_variant            | LOW       | 1.0      | 2972.7  | 3171 | Patient4_060522 |
| B.1.1.529 (BA.2) | 9534  | C          | T   | SNP | Homozygous | orf1ab | QHD43415.1 | 1 | c.9269C>T                 | p.Thr3090Ile         | missense_variant              | MODE RATE | 1.0      | 1227.96 | 165  | Patient4_060522 |
| B.1.1.529 (BA.2) | 9866  | C          | T   | SNP | Homozygous | orf1ab | QHD43415.1 | 1 | c.9601C>T                 | p.Leu3201Phe         | missense_variant              | MODE RATE | 1.0      | 2971.27 | 8500 | Patient4_060522 |
| B.1.1.529 (BA.2) | 10029 | C          | T   | SNP | Homozygous | orf1ab | QHD43415.1 | 1 | c.9764C>T                 | p.Thr3255Ile         | missense_variant              | MODE RATE | 0.992481 | 2885.25 | 7898 | Patient4_060522 |
| B.1.1.529 (BA.2) | 10198 | C          | T   | SNP | Homozygous | orf1ab | QHD43415.1 | 1 | c.9933C>T                 | p.Asp3311Asp         | synonymous_variant            | LOW       | 1.0      | 2982.15 | 9217 | Patient4_060522 |
| B.1.1.529 (BA.2) | 10447 | GCC        | ACA | MNP | Homozygous | orf1ab | QHD43415.1 | 1 | c.10182_10184delGCCinsACA | p.Pro3395His         | missense_variant              | MODE RATE | 1.0      | 2968.72 | 3532 | Patient4_060522 |
| B.1.1.529 (BA.2) | 11287 | GTCTGGTTTT | G   | DEL | Homozygous | orf1ab | QHD43415.1 | 1 | c.11023_11031delTCTGGTTTT | p.Ser3675_Phe3677del | conservative_inframe_deletion | MODE RATE | 1.0      | 2947.64 | 9927 | Patient4_060522 |
| B.1.1.529 (BA.2) | 12880 | C          | T   | SNP | Homozygous | orf1ab | QHD43415.1 | 1 | c.12615C>T                | p.Ile4205Ile         | synonymous_variant            | LOW       | 0.9975   | 2948.64 | 4543 | Patient4_060522 |
| B.1.1.529 (BA.2) | 14408 | C          | T   | SNP | Homozygous | orf1ab | QHD43415.1 | 2 | c.14144C>T                | p.Pro4715Leu         | missense_variant              | MODE RATE | 0.9975   | 2947.3  | 5097 | Patient4_060522 |
| B.1.1.529 (BA.2) | 15714 | C          | T   | SNP | Homozygous | orf1ab | QHD43415.1 | 2 | c.15450C>T                | p.Leu5150Leu         | synonymous_variant            | LOW       | 1.0      | 2982.21 | 8759 | Patient4_060522 |
| B.1.1.529 (BA.2) | 17410 | C          | T   | SNP | Homozygous | orf1ab | QHD43415.1 | 2 | c.17146C>T                | p.Arg5716Cys         | missense_variant              | MODE RATE | 1.0      | 2974.76 | 6919 | Patient4_060522 |
| B.1.1.529 (BA.2) | 18163 | A          | G   | SNP | Homozygous | orf1ab | QHD43415.1 | 2 | c.17899A>G                | p.Ile5967Val         | missense_variant              | MODE RATE | 1.0      | 2982.09 | 2074 | Patient4_060522 |
| B.1.1.529 (BA.2) | 18888 | C          | T   | SNP | Homozygous | orf1ab | QHD43415.1 | 2 | c.18624C>T                | p.His6208His         | synonymous_variant            | LOW       | 0.9975   | 2948.89 | 5756 | Patient4_060522 |
| B.1.1.529 (BA.2) | 19955 | C          | T   | SNP | Homozygous | orf1ab | QHD43415.1 | 2 | c.19691C>T                | p.Thr6564Ile         | missense_variant              | MODE RATE | 1.0      | 2974.57 | 6765 | Patient4_060522 |
| B.1.1.529 (BA.2) | 20055 | A          | G   | SNP | Homozygous | orf1ab | QHD43415.1 | 2 | c.19791A>G                | p.Glu6597Glu         | synonymous_variant            | LOW       | 0.9975   | 2379.74 | 6176 | Patient4_060522 |
| B.1.1.529 (BA.2) | 2091  | G          | A   | SNP | Homozygous | orf1ab | QHD43415.1 | 2 | c.20655G>A                | p.Gln6885Gln         | synonymous_variant            | LOW       | 0.995    | 2919.6  | 7939 | Patient4_060522 |

|                  |       |            |      |     |            |   |            |   |                           |                        |                             |           |          |         |       |                  |
|------------------|-------|------------|------|-----|------------|---|------------|---|---------------------------|------------------------|-----------------------------|-----------|----------|---------|-------|------------------|
|                  | 9     |            |      |     | s          |   |            |   |                           |                        |                             |           |          | 2       |       | 22               |
| B.1.1.529 (BA.2) | 21618 | C          | T    | SNP | Homozygous | S | QHD43416.1 | 1 | c.56C>T                   | p.Thr19Ile             | missense_variant            | MODE RATE | 0.9975   | 2949.1  | 9208  | Patient 4_060522 |
| B.1.1.529 (BA.2) | 21632 | TTACCCCCTG | T    | DEL | Homozygous | S | QHD43416.1 | 1 | c.71_79delTACCCCCTG       | p.Leu24_Ala27delinsSer | disruptive_inframe_deletion | MODE RATE | 1.0      | 2937.58 | 9058  | Patient 4_060522 |
| B.1.1.529 (BA.2) | 21987 | G          | A    | SNP | Homozygous | S | QHD43416.1 | 1 | c.425G>A                  | p.Gly142Asp            | missense_variant            | MODE RATE | 1.0      | 2954.86 | 7226  | Patient 4_060522 |
| B.1.1.529 (BA.2) | 22200 | T          | G    | SNP | Homozygous | S | QHD43416.1 | 1 | c.638T>G                  | p.Val213Gly            | missense_variant            | MODE RATE | 1.0      | 2981.17 | 5857  | Patient 4_060522 |
| B.1.1.529 (BA.2) | 22578 | G          | A    | SNP | Homozygous | S | QHD43416.1 | 1 | c.1016G>A                 | p.Gly339Asp            | missense_variant            | MODE RATE | 1.0      | 2974.77 | 5705  | Patient 4_060522 |
| B.1.1.529 (BA.2) | 22674 | C          | T    | SNP | Homozygous | S | QHD43416.1 | 1 | c.1112C>T                 | p.Ser371Phe            | missense_variant            | MODE RATE | 0.994987 | 2339.82 | 2332  | Patient 4_060522 |
| B.1.1.529 (BA.2) | 22679 | T          | C    | SNP | Homozygous | S | QHD43416.1 | 1 | c.1117T>C                 | p.Ser373Pro            | missense_variant            | MODE RATE | 1.0      | 2981.89 | 2338  | Patient 4_060522 |
| B.1.1.529 (BA.2) | 22686 | CCA        | TCG  | MNP | Homozygous | S | QHD43416.1 | 1 | c.1124_1126delCCAAinsTCG  | p.SerThr375PheAla      | missense_variant            | MODE RATE | 1.0      | 2930.49 | 2253  | Patient 4_060522 |
| B.1.1.529 (BA.2) | 22775 | G          | A    | SNP | Homozygous | S | QHD43416.1 | 1 | c.1213G>A                 | p.Asp405Asn            | missense_variant            | MODE RATE | 1.0      | 2982.21 | 2296  | Patient 4_060522 |
| B.1.1.529 (BA.2) | 22786 | A          | C    | SNP | Homozygous | S | QHD43416.1 | 1 | c.1224A>C                 | p.Arg408Ser            | missense_variant            | MODE RATE | 1.0      | 2982.21 | 2291  | Patient 4_060522 |
| B.1.1.529 (BA.2) | 22813 | G          | T    | SNP | Homozygous | S | QHD43416.1 | 1 | c.1251G>T                 | p.Lys417Asn            | missense_variant            | MODE RATE | 1.0      | 2982.18 | 7954  | Patient 4_060522 |
| B.1.1.529 (BA.2) | 22882 | T          | G    | SNP | Homozygous | S | QHD43416.1 | 1 | c.1320T>G                 | p.Asn440Lys            | missense_variant            | MODE RATE | 1.0      | 2974.76 | 11128 | Patient 4_060522 |
| B.1.1.529 (BA.2) | 22992 | GCAC       | ACAA | MNP | Homozygous | S | QHD43416.1 | 1 | c.1430_1433delGCACinsACAA | p.SerThr477AsnLys      | missense_variant            | MODE RATE | 1.0      | 2957.86 | 5408  | Patient 4_060522 |
| B.1.1.529 (BA.2) | 23013 | A          | C    | SNP | Homozygous | S | QHD43416.1 | 1 | c.1451A>C                 | p.Glu484Ala            | missense_variant            | MODE RATE | 1.0      | 2982.19 | 5399  | Patient 4_060522 |
| B.1.1.529 (BA.2) | 23040 | A          | G    | SNP | Homozygous | S | QHD43416.1 | 1 | c.1478A>G                 | p.Gln493Arg            | missense_variant            | MODE RATE | 0.994366 | 2580.16 | 5309  | Patient 4_060522 |
| B.1.1.529 (BA.2) | 23403 | A          | G    | SNP | Homozygous | S | QHD43416.1 | 1 | c.1841A>G                 | p.Asp614Gly            | missense_variant            | MODE RATE | 1.0      | 2981.13 | 8124  | Patient 4_060522 |

|                  |       |   |   |     |            |       |            |   |           |              |                    |           |     |         |       |                 |
|------------------|-------|---|---|-----|------------|-------|------------|---|-----------|--------------|--------------------|-----------|-----|---------|-------|-----------------|
| B.1.1.529 (BA.2) | 23525 | C | T | SNP | Homozygous | S     | QHD43416.1 | 1 | c.1963C>T | p.His655Tyr  | missense_variant   | MODE RATE | 1.0 | 2981.98 | 9844  | Patient4_060522 |
| B.1.1.529 (BA.2) | 23599 | T | G | SNP | Homozygous | S     | QHD43416.1 | 1 | c.2037T>G | p.Asn679Lys  | missense_variant   | MODE RATE | 1.0 | 2982.21 | 8861  | Patient4_060522 |
| B.1.1.529 (BA.2) | 23604 | C | A | SNP | Homozygous | S     | QHD43416.1 | 1 | c.2042C>A | p.Pro681His  | missense_variant   | MODE RATE | 1.0 | 2975.36 | 8863  | Patient4_060522 |
| B.1.1.529 (BA.2) | 23854 | C | A | SNP | Homozygous | S     | QHD43416.1 | 1 | c.2292C>A | p.Asn764Lys  | missense_variant   | MODE RATE | 1.0 | 2959.69 | 2752  | Patient4_060522 |
| B.1.1.529 (BA.2) | 23948 | G | T | SNP | Homozygous | S     | QHD43416.1 | 1 | c.2386G>T | p.Asp796Tyr  | missense_variant   | MODE RATE | 1.0 | 2974.75 | 2768  | Patient4_060522 |
| B.1.1.529 (BA.2) | 24424 | A | T | SNP | Homozygous | S     | QHD43416.1 | 1 | c.2862A>T | p.Gln954His  | missense_variant   | MODE RATE | 1.0 | 2981.54 | 2309  | Patient4_060522 |
| B.1.1.529 (BA.2) | 24469 | T | A | SNP | Homozygous | S     | QHD43416.1 | 1 | c.2907T>A | p.Asn969Lys  | missense_variant   | MODE RATE | 1.0 | 2930.64 | 6945  | Patient4_060522 |
| B.1.1.529 (BA.2) | 25000 | C | T | SNP | Homozygous | S     | QHD43416.1 | 1 | c.3438C>T | p.Asp1146Asp | synonymous_variant | LOW       | 1.0 | 2979.74 | 7151  | Patient4_060522 |
| B.1.1.529 (BA.2) | 25584 | C | T | SNP | Homozygous | ORF3a | QHD43417.1 | 1 | c.192C>T  | p.Thr64Thr   | synonymous_variant | LOW       | 1.0 | 2965.35 | 5885  | Patient4_060522 |
| B.1.1.529 (BA.2) | 25587 | C | T | SNP | Homozygous | ORF3a | QHD43417.1 | 1 | c.195C>T  | p.Leu65Leu   | synonymous_variant | LOW       | 1.0 | 2982.12 | 5886  | Patient4_060522 |
| B.1.1.529 (BA.2) | 26060 | C | T | SNP | Homozygous | ORF3a | QHD43417.1 | 1 | c.668C>T  | p.Thr223Ile  | missense_variant   | MODE RATE | 1.0 | 2960.41 | 5324  | Patient4_060522 |
| B.1.1.529 (BA.2) | 26270 | C | T | SNP | Homozygous | E     | QHD43418.1 | 1 | c.26C>T   | p.Thr9Ile    | missense_variant   | MODE RATE | 1.0 | 2982.21 | 12218 | Patient4_060522 |
| B.1.1.529 (BA.2) | 26577 | C | G | SNP | Homozygous | M     | QHD43419.1 | 1 | c.55C>G   | p.Gln19Glu   | missense_variant   | MODE RATE | 1.0 | 2974.75 | 3837  | Patient4_060522 |
| B.1.1.529 (BA.2) | 26709 | G | A | SNP | Homozygous | M     | QHD43419.1 | 1 | c.187G>A  | p.Ala63Thr   | missense_variant   | MODE RATE | 1.0 | 2982.21 | 4564  | Patient4_060522 |
| B.1.1.529 (BA.2) | 26858 | C | T | SNP | Homozygous | M     | QHD43419.1 | 1 | c.336C>T  | p.Phe112Phe  | synonymous_variant | LOW       | 1.0 | 2982.11 | 4477  | Patient4_060522 |
| B.1.1.529 (BA.2) | 27002 | C | T | SNP | Homozygous | M     | QHD43419.1 | 1 | c.480C>T  | p.Asp160Asp  | synonymous_variant | LOW       | 1.0 | 2982.21 | 7459  | Patient4_060522 |
| B.1.1.529 (BA.2) | 2725  | A | C | SNP | Homozygous | ORF6  | QHD43420.1 | 1 | c.58A>C   | p.Arg20Arg   | synonymous_variant | LOW       | 1.0 | 2974.5  | 6857  | Patient4_0605   |

|                    |       |                             |     |     |              |        |            |    |                                            |                   |                             |          |          |         |       |                 |
|--------------------|-------|-----------------------------|-----|-----|--------------|--------|------------|----|--------------------------------------------|-------------------|-----------------------------|----------|----------|---------|-------|-----------------|
|                    | 9     |                             |     |     | s            |        |            |    |                                            |                   |                             |          |          | 7       |       | 22              |
| B.1.1.529 (BA.2)   | 27382 | GAT                         | CTC | MNP | Homozygous   | ORF6   | QHD43420.1 | 1  | c.181_183delGATinsCTC                      | p.Asp61Leu        | missense_variant            | MODERATE | 1.0      | 2935.96 | 3649  | Patient4_060522 |
| B.1.1.529 (BA.2)   | 27494 | C                           | T   | SNP | Heterozygous | ORF7a  | QHD43421.1 | 1  | c.101C>T                                   | p.Pro34Leu        | missense_variant            | MODERATE | 0.407609 | 125.805 | 184   | Patient4_060522 |
| B.1.1.529 (BA.2)   | 27807 | C                           | T   | SNP | Homozygous   | ORF8   | QHD43422.1 | -1 | c.-87C>T                                   | .                 | upstream_gene_variant       | MODIFIER | 1.0      | 2982.21 | 9481  | Patient4_060522 |
| B.1.1.529 (BA.2)   | 28271 | A                           | T   | SNP | Homozygous   | N      | QHD43423.2 | -1 | c.-3A>T                                    | .                 | upstream_gene_variant       | MODIFIER | 1.0      | 2915.46 | 10170 | Patient4_060522 |
| B.1.1.529 (BA.2)   | 28311 | C                           | T   | SNP | Homozygous   | N      | QHD43423.2 | 1  | c.38C>T                                    | p.Pro13Leu        | missense_variant            | MODERATE | 0.99     | 2865.31 | 10175 | Patient4_060522 |
| B.1.1.529 (BA.2)   | 28361 | GGAGAACGCA                  | G   | DEL | Homozygous   | N      | QHD43423.2 | 1  | c.90_98delAGAACGCAG                        | p.Glu31_Ser33del  | disruptive_inframe_deletion | MODERATE | 1.0      | 2955.99 | 3895  | Patient4_060522 |
| B.1.1.529 (BA.2)   | 28881 | GGG                         | AAC | MNP | Homozygous   | N      | QHD43423.2 | 1  | c.608_610delGGGinsAAC                      | p.ArgGly203LysArg | missense_variant            | MODERATE | 1.0      | 2967.34 | 1975  | Patient4_060522 |
| B.1.1.529 (BA.2)   | 29250 | C                           | T   | SNP | Heterozygous | N      | QHD43423.2 | 1  | c.977C>T                                   | p.Pro326Leu       | missense_variant            | MODERATE | 0.7675   | 1438.82 | 2675  | Patient4_060522 |
| B.1.1.529 (BA.2)   | 29510 | A                           | C   | SNP | Homozygous   | N      | QHD43423.2 | 1  | c.1237A>C                                  | p.Ser413Arg       | missense_variant            | MODERATE | 1.0      | 2975.76 | 972   | Patient4_060522 |
| B.1.1.529 (BA.2)   | 29733 | CGAGGCCACGCGGAGTACGATCGAGTG | C   | DEL | Homozygous   | S      | QHD43416.1 | -1 | c.*4350_*4375delGAGGCCACGCGGAGTACGATCGAGTG | .                 | downstream_gene_variant     | MODIFIER | 1.0      | 2952.87 | 1244  | Patient4_060522 |
| B.1.1.529 (BA.2.9) | 44    | C                           | T   | SNP | Homozygous   | orf1ab | QHD43415.1 | -1 | c.-222C>T                                  | .                 | upstream_gene_variant       | MODIFIER | 1.0      | 2974.95 | 7074  | Patient3_280322 |
| B.1.1.529 (BA.2.9) | 241   | C                           | T   | SNP | Homozygous   | orf1ab | QHD43415.1 | -1 | c.-25C>T                                   | .                 | upstream_gene_variant       | MODIFIER | 1.0      | 2967.05 | 406   | Patient3_280322 |
| B.1.1.529 (BA.2.9) | 670   | T                           | G   | SNP | Homozygous   | orf1ab | QHD43415.1 | 1  | c.405T>G                                   | p.Ser135Arg       | missense_variant            | MODERATE | 0.995    | 2919.63 | 7667  | Patient3_280322 |
| B.1.1.529 (BA.2.9) | 2790  | C                           | T   | SNP | Homozygous   | orf1ab | QHD43415.1 | 1  | c.2525C>T                                  | p.Thr842Ile       | missense_variant            | MODERATE | 1.0      | 2886.3  | 3822  | Patient3_280322 |
| B.1.1.529 (BA.2.9) | 3037  | C                           | T   | SNP | Homozygous   | orf1ab | QHD43415.1 | 1  | c.2772C>T                                  | p.Phe924Phe       | synonymous_variant          | LOW      | 1.0      | 2964.64 | 6043  | Patient3_280322 |
| B.1.1.529 (BA.2.9) | 4184  | G                           | A   | SNP | Homozygous   | orf1ab | QHD43415.1 | 1  | c.3919G>A                                  | p.Gly1307Ser      | missense_variant            | MODERATE | 1.0      | 2982.17 | 5693  | Patient3_280322 |

|                    |       |            |     |     |            |        |            |   |                            |                      |                               |           |          |         |      |                 |
|--------------------|-------|------------|-----|-----|------------|--------|------------|---|----------------------------|----------------------|-------------------------------|-----------|----------|---------|------|-----------------|
| B.1.1.529 (BA.2.9) | 4321  | C          | T   | SNP | Homozygous | orf1ab | QHD43415.1 | 1 | c.4056C>T                  | p.Ala1352Ala         | synonymous_variant            | LOW       | 0.985    | 2814.89 | 6225 | Patient3_280322 |
| B.1.1.529 (BA.2.9) | 7101  | C          | T   | SNP | Homozygous | orf1ab | QHD43415.1 | 1 | c.6836C>T                  | p.Ala2279Val         | missense_variant              | MODE RATE | 1.0      | 2982.21 | 2035 | Patient3_280322 |
| B.1.1.529 (BA.2.9) | 9344  | C          | T   | SNP | Homozygous | orf1ab | QHD43415.1 | 1 | c.9079C>T                  | p.Leu3027Phe         | missense_variant              | MODE RATE | 1.0      | 2976.5  | 6054 | Patient3_280322 |
| B.1.1.529 (BA.2.9) | 9424  | A          | G   | SNP | Homozygous | orf1ab | QHD43415.1 | 1 | c.9159A>G                  | p.Val3053Val         | synonymous_variant            | LOW       | 1.0      | 2981.06 | 4095 | Patient3_280322 |
| B.1.1.529 (BA.2.9) | 9534  | C          | T   | SNP | Homozygous | orf1ab | QHD43415.1 | 1 | c.9269C>T                  | p.Thr3090Ile         | missense_variant              | MODE RATE | 1.0      | 1173.6  | 158  | Patient3_280322 |
| B.1.1.529 (BA.2.9) | 9866  | C          | T   | SNP | Homozygous | orf1ab | QHD43415.1 | 1 | c.9601C>T                  | p.Leu3201Phe         | missense_variant              | MODE RATE | 1.0      | 2969.34 | 6594 | Patient3_280322 |
| B.1.1.529 (BA.2.9) | 10029 | C          | T   | SNP | Homozygous | orf1ab | QHD43415.1 | 1 | c.9764C>T                  | p.Thr3255Ile         | missense_variant              | MODE RATE | 0.994987 | 2912.33 | 7027 | Patient3_280322 |
| B.1.1.529 (BA.2.9) | 10198 | C          | T   | SNP | Homozygous | orf1ab | QHD43415.1 | 1 | c.9933C>T                  | p.Asp3311Asp         | synonymous_variant            | LOW       | 0.997494 | 2941.3  | 7750 | Patient3_280322 |
| B.1.1.529 (BA.2.9) | 10447 | GCC        | ACA | MNP | Homozygous | orf1ab | QHD43415.1 | 1 | c.10182_10184delGCCin sACA | p.Pro3395His         | missense_variant              | MODE RATE | 1.0      | 2967.27 | 3632 | Patient3_280322 |
| B.1.1.529 (BA.2.9) | 11287 | GTCTGGTTTT | G   | DEL | Homozygous | orf1ab | QHD43415.1 | 1 | c.11023_11031delTCTGGTTTT  | p.Ser3675_Phe3677del | conservative_inframe_deletion | MODE RATE | 1.0      | 2959.8  | 8241 | Patient3_280322 |
| B.1.1.529 (BA.2.9) | 12880 | C          | T   | SNP | Homozygous | orf1ab | QHD43415.1 | 1 | c.12615C>T                 | p.Ile4205Ile         | synonymous_variant            | LOW       | 1.0      | 2982.17 | 3826 | Patient3_280322 |
| B.1.1.529 (BA.2.9) | 14408 | C          | T   | SNP | Homozygous | orf1ab | QHD43415.1 | 2 | c.14144C>T                 | p.Pro4715Leu         | missense_variant              | MODE RATE | 0.992481 | 2884.38 | 2447 | Patient3_280322 |
| B.1.1.529 (BA.2.9) | 15714 | C          | T   | SNP | Homozygous | orf1ab | QHD43415.1 | 2 | c.15450C>T                 | p.Leu5150Leu         | synonymous_variant            | LOW       | 1.0      | 2982.21 | 5866 | Patient3_280322 |
| B.1.1.529 (BA.2.9) | 17410 | C          | T   | SNP | Homozygous | orf1ab | QHD43415.1 | 2 | c.17146C>T                 | p.Arg5716Cys         | missense_variant              | MODE RATE | 0.9975   | 2948.9  | 9123 | Patient3_280322 |
| B.1.1.529 (BA.2.9) | 18163 | A          | G   | SNP | Homozygous | orf1ab | QHD43415.1 | 2 | c.17899A>G                 | p.Ile5967Val         | missense_variant              | MODE RATE | 1.0      | 2982.19 | 1803 | Patient3_280322 |
| B.1.1.529 (BA.2.9) | 18636 | G          | T   | SNP | Homozygous | orf1ab | QHD43415.1 | 2 | c.18372G>T                 | p.Val6124Val         | synonymous_variant            | LOW       | 0.9975   | 2379.91 | 2550 | Patient3_280322 |
| B.1.1.529          | 1947  | T          | A   | SNP | Homozygous | orf1ab | QHD43415.1 | 2 | c.19210T>A                 | p.Leu6404Ile         | missense_variant              | MODE RATE | 1.0      | 2948.4  | 4254 | Patient3_2803   |



|                       |       |            |      |     |            |        |            |   |                           |                        |                             |           |        |         |      |                  |
|-----------------------|-------|------------|------|-----|------------|--------|------------|---|---------------------------|------------------------|-----------------------------|-----------|--------|---------|------|------------------|
| (BA.2.9)              | 4     |            |      |     | s          |        |            |   |                           |                        |                             |           |        | 9       |      | 22               |
| B.1.1.529<br>(BA.2.9) | 19955 | C          | T    | SNP | Homozygous | orf1ab | QHD43415.1 | 2 | c.19691C>T                | p.Thr6564Ile           | missense_variant            | MODE RATE | 1.0    | 2980.36 | 5064 | Patient 3_280322 |
| B.1.1.529<br>(BA.2.9) | 20055 | A          | G    | SNP | Homozygous | orf1ab | QHD43415.1 | 2 | c.19791A>G                | p.Glu6597Glu           | synonymous_variant          | LOW       | 1.0    | 2935.12 | 5195 | Patient 3_280322 |
| B.1.1.529<br>(BA.2.9) | 21618 | C          | T    | SNP | Homozygous | S      | QHD43416.1 | 1 | c.56C>T                   | p.Thr19Ile             | missense_variant            | MODE RATE | 1.0    | 2982.21 | 5905 | Patient 3_280322 |
| B.1.1.529<br>(BA.2.9) | 21632 | TTACCCCCTG | T    | DEL | Homozygous | S      | QHD43416.1 | 1 | c.71_79delTACCCCCTG       | p.Leu24_Ala27delinsSer | disruptive_inframe_deletion | MODE RATE | 1.0    | 2935.46 | 5825 | Patient 3_280322 |
| B.1.1.529<br>(BA.2.9) | 21987 | G          | A    | SNP | Homozygous | S      | QHD43416.1 | 1 | c.425G>A                  | p.Gly142Asp            | missense_variant            | MODE RATE | 0.9975 | 2948.87 | 4416 | Patient 3_280322 |
| B.1.1.529<br>(BA.2.9) | 22200 | T          | G    | SNP | Homozygous | S      | QHD43416.1 | 1 | c.638T>G                  | p.Val213Gly            | missense_variant            | MODE RATE | 1.0    | 2973.75 | 4240 | Patient 3_280322 |
| B.1.1.529<br>(BA.2.9) | 22578 | G          | A    | SNP | Homozygous | S      | QHD43416.1 | 1 | c.1016G>A                 | p.Gly339Asp            | missense_variant            | MODE RATE | 0.9975 | 2948.9  | 4524 | Patient 3_280322 |
| B.1.1.529<br>(BA.2.9) | 22674 | C          | T    | SNP | Homozygous | S      | QHD43416.1 | 1 | c.1112C>T                 | p.Ser371Phe            | missense_variant            | MODE RATE | 0.9975 | 2379.37 | 1854 | Patient 3_280322 |
| B.1.1.529<br>(BA.2.9) | 22679 | T          | C    | SNP | Homozygous | S      | QHD43416.1 | 1 | c.1117T>C                 | p.Ser373Pro            | missense_variant            | MODE RATE | 0.985  | 2813.33 | 1848 | Patient 3_280322 |
| B.1.1.529<br>(BA.2.9) | 22686 | CCA        | TCG  | MNP | Homozygous | S      | QHD43416.1 | 1 | c.1124_1126delCCAIinsTCG  | p.SerThr375PheAla      | missense_variant            | MODE RATE | 1.0    | 2961.48 | 1601 | Patient 3_280322 |
| B.1.1.529<br>(BA.2.9) | 22775 | G          | A    | SNP | Homozygous | S      | QHD43416.1 | 1 | c.1213G>A                 | p.Asp405Asn            | missense_variant            | MODE RATE | 0.9975 | 2943.38 | 1618 | Patient 3_280322 |
| B.1.1.529<br>(BA.2.9) | 22786 | A          | C    | SNP | Homozygous | S      | QHD43416.1 | 1 | c.1224A>C                 | p.Arg408Ser            | missense_variant            | MODE RATE | 1.0    | 2982.12 | 1617 | Patient 3_280322 |
| B.1.1.529<br>(BA.2.9) | 22792 | C          | T    | SNP | Homozygous | S      | QHD43416.1 | 1 | c.1230C>T                 | p.Ile410Ile            | synonymous_variant          | LOW       | 0.9975 | 2948.82 | 1610 | Patient 3_280322 |
| B.1.1.529<br>(BA.2.9) | 22813 | G          | T    | SNP | Homozygous | S      | QHD43416.1 | 1 | c.1251G>T                 | p.Lys417Asn            | missense_variant            | MODE RATE | 0.9975 | 2945.62 | 1690 | Patient 3_280322 |
| B.1.1.529<br>(BA.2.9) | 22882 | T          | G    | SNP | Homozygous | S      | QHD43416.1 | 1 | c.1320T>G                 | p.Asn440Lys            | missense_variant            | MODE RATE | 1.0    | 2982.2  | 7017 | Patient 3_280322 |
| B.1.1.529<br>(BA.2.9) | 22992 | GCAC       | ACAA | MNP | Homozygous | S      | QHD43416.1 | 1 | c.1430_1433delGCACinsACAA | p.SerThr477AsnLys      | missense_variant            | MODE RATE | 1.0    | 2974.76 | 6976 | Patient 3_280322 |

|                    |       |   |   |     |            |       |            |   |           |              |                    |           |          |         |       |                 |
|--------------------|-------|---|---|-----|------------|-------|------------|---|-----------|--------------|--------------------|-----------|----------|---------|-------|-----------------|
| B.1.1.529 (BA.2.9) | 23013 | A | C | SNP | Homozygous | S     | QHD43416.1 | 1 | c.1451A>C | p.Glu484Ala  | missense_variant   | MODE RATE | 0.9975   | 2950.47 | 6959  | Patient3_280322 |
| B.1.1.529 (BA.2.9) | 23040 | A | G | SNP | Homozygous | S     | QHD43416.1 | 1 | c.1478A>G | p.Gln493Arg  | missense_variant   | MODE RATE | 0.997389 | 2819.27 | 6913  | Patient3_280322 |
| B.1.1.529 (BA.2.9) | 23403 | A | G | SNP | Homozygous | S     | QHD43416.1 | 1 | c.1841A>G | p.Asp614Gly  | missense_variant   | MODE RATE | 1.0      | 2977.34 | 8123  | Patient3_280322 |
| B.1.1.529 (BA.2.9) | 23410 | C | T | SNP | Homozygous | S     | QHD43416.1 | 1 | c.1848C>T | p.Asn616Asn  | synonymous_variant | LOW       | 1.0      | 2982.2  | 8135  | Patient3_280322 |
| B.1.1.529 (BA.2.9) | 23525 | C | T | SNP | Homozygous | S     | QHD43416.1 | 1 | c.1963C>T | p.His655Tyr  | missense_variant   | MODE RATE | 1.0      | 2982.09 | 8971  | Patient3_280322 |
| B.1.1.529 (BA.2.9) | 23599 | T | G | SNP | Homozygous | S     | QHD43416.1 | 1 | c.2037T>G | p.Asn679Lys  | missense_variant   | MODE RATE | 0.9975   | 2948.89 | 7779  | Patient3_280322 |
| B.1.1.529 (BA.2.9) | 23604 | C | A | SNP | Homozygous | S     | QHD43416.1 | 1 | c.2042C>A | p.Pro681His  | missense_variant   | MODE RATE | 1.0      | 2981.7  | 7778  | Patient3_280322 |
| B.1.1.529 (BA.2.9) | 23854 | C | A | SNP | Homozygous | S     | QHD43416.1 | 1 | c.2292C>A | p.Asn764Lys  | missense_variant   | MODE RATE | 0.9975   | 2373.35 | 3080  | Patient3_280322 |
| B.1.1.529 (BA.2.9) | 23948 | G | T | SNP | Homozygous | S     | QHD43416.1 | 1 | c.2386G>T | p.Asp796Tyr  | missense_variant   | MODE RATE | 1.0      | 2982.01 | 2446  | Patient3_280322 |
| B.1.1.529 (BA.2.9) | 24424 | A | T | SNP | Homozygous | S     | QHD43416.1 | 1 | c.2862A>T | p.Gln954His  | missense_variant   | MODE RATE | 0.9975   | 2380.16 | 3492  | Patient3_280322 |
| B.1.1.529 (BA.2.9) | 24469 | T | A | SNP | Homozygous | S     | QHD43416.1 | 1 | c.2907T>A | p.Asn969Lys  | missense_variant   | MODE RATE | 0.9975   | 2886.7  | 8616  | Patient3_280322 |
| B.1.1.529 (BA.2.9) | 25000 | C | T | SNP | Homozygous | S     | QHD43416.1 | 1 | c.3438C>T | p.Asp1146Asp | synonymous_variant | LOW       | 0.995    | 2916.7  | 6039  | Patient3_280322 |
| B.1.1.529 (BA.2.9) | 25584 | C | T | SNP | Homozygous | ORF3a | QHD43417.1 | 1 | c.192C>T  | p.Thr64Thr   | synonymous_variant | LOW       | 0.992481 | 2884.93 | 2772  | Patient3_280322 |
| B.1.1.529 (BA.2.9) | 25624 | C | T | SNP | Homozygous | ORF3a | QHD43417.1 | 1 | c.232C>T  | p.His78Tyr   | missense_variant   | MODE RATE | 0.997487 | 2924.32 | 4109  | Patient3_280322 |
| B.1.1.529 (BA.2.9) | 26060 | C | T | SNP | Homozygous | ORF3a | QHD43417.1 | 1 | c.668C>T  | p.Thr223Ile  | missense_variant   | MODE RATE | 1.0      | 2982.21 | 4567  | Patient3_280322 |
| B.1.1.529 (BA.2.9) | 26270 | C | T | SNP | Homozygous | E     | QHD43418.1 | 1 | c.26C>T   | p.Thr9Ile    | missense_variant   | MODE RATE | 1.0      | 2970.76 | 12614 | Patient3_280322 |
| B.1.1.529          | 2657  | C | G | SNP | Homozygous | M     | QHD43419.1 | 1 | c.55C>G   | p.Gln19Glu   | missense_variant   | MODE RATE | 1.0      | 2982.2  | 2277  | Patient3_2803   |

|                        |       |                                     |     |     |            |        |            |    |                                            |                   |                             |           |          |         |       |                  |
|------------------------|-------|-------------------------------------|-----|-----|------------|--------|------------|----|--------------------------------------------|-------------------|-----------------------------|-----------|----------|---------|-------|------------------|
| (BA.2.9)               | 7     |                                     |     |     | s          |        |            |    |                                            |                   |                             |           |          | 1       |       | 22               |
| B.1.1.529<br>(BA.2.9)  | 26709 | G                                   | A   | SNP | Homozygous | M      | QHD43419.1 | 1  | c.187G>A                                   | p.Ala63Thr        | missense_variant            | MODE RATE | 0.9975   | 2948.91 | 4464  | Patient 3_280322 |
| B.1.1.529<br>(BA.2.9)  | 26753 | C                                   | T   | SNP | Homozygous | M      | QHD43419.1 | 1  | c.231C>T                                   | p.Thr77Thr        | synonymous_variant          | LOW       | 0.995    | 2919.66 | 4482  | Patient 3_280322 |
| B.1.1.529<br>(BA.2.9)  | 26858 | C                                   | T   | SNP | Homozygous | M      | QHD43419.1 | 1  | c.336C>T                                   | p.Phe112Phe       | synonymous_variant          | LOW       | 0.9975   | 2948.83 | 4686  | Patient 3_280322 |
| B.1.1.529<br>(BA.2.9)  | 27259 | A                                   | C   | SNP | Homozygous | ORF6   | QHD43420.1 | 1  | c.58A>C                                    | p.Arg20Arg        | synonymous_variant          | LOW       | 1.0      | 2982.08 | 6270  | Patient 3_280322 |
| B.1.1.529<br>(BA.2.9)  | 27382 | GAT                                 | CTC | MNP | Homozygous | ORF6   | QHD43420.1 | 1  | c.181_183delGATinsCTC                      | p.Asp61Leu        | missense_variant            | MODE RATE | 1.0      | 2945.82 | 2990  | Patient 3_280322 |
| B.1.1.529<br>(BA.2.9)  | 27807 | C                                   | T   | SNP | Homozygous | ORF8   | QHD43422.1 | -1 | c.-87C>T                                   | .                 | upstream_gene_variant       | MODIFIER  | 0.9975   | 2948.9  | 7698  | Patient 3_280322 |
| B.1.1.529<br>(BA.2.9)  | 28271 | A                                   | T   | SNP | Homozygous | N      | QHD43423.2 | -1 | c.-3A>T                                    | .                 | upstream_gene_variant       | MODIFIER  | 0.9875   | 2841.76 | 13796 | Patient 3_280322 |
| B.1.1.529<br>(BA.2.9)  | 28311 | C                                   | T   | SNP | Homozygous | N      | QHD43423.2 | 1  | c.38C>T                                    | p.Pro13Leu        | missense_variant            | MODE RATE | 0.995    | 2352.92 | 13796 | Patient 3_280322 |
| B.1.1.529<br>(BA.2.9)  | 28361 | GGAGAACGCA                          | G   | DEL | Homozygous | N      | QHD43423.2 | 1  | c.90_98delAGAACGCAG                        | p.Glu31_Ser33del  | disruptive_inframe_deletion | MODE RATE | 1.0      | 2922.71 | 4049  | Patient 3_280322 |
| B.1.1.529<br>(BA.2.9)  | 28881 | GGG                                 | AAC | MNP | Homozygous | N      | QHD43423.2 | 1  | c.608_610delGGGinsAAC                      | p.ArgGly203LysArg | missense_variant            | MODE RATE | 1.0      | 2959.9  | 2804  | Patient 3_280322 |
| B.1.1.529<br>(BA.2.9)  | 29510 | A                                   | C   | SNP | Homozygous | N      | QHD43423.2 | 1  | c.1237A>C                                  | p.Ser413Arg       | missense_variant            | MODE RATE | 1.0      | 2944.0  | 1403  | Patient 3_280322 |
| B.1.1.529<br>(BA.2.9)  | 29733 | CGAGGCCACGCG<br>GAGTACGATCGA<br>GTG | C   | DEL | Homozygous | S      | QHD43416.1 | -1 | c.*4350_*4375delGAGGCCACGCGGAGTACGATCGAGTG | .                 | downstream_gene_variant     | MODIFIER  | 1.0      | 2955.72 | 749   | Patient 3_280322 |
| B.1.1.529<br>(BA.1.15) | 241   | C                                   | T   | SNP | Homozygous | orf1ab | QHD43415.1 | -1 | c.-25C>T                                   | .                 | upstream_gene_variant       | MODIFIER  | 0.990566 | 760.268 | 106   | Patient 5_090122 |
| B.1.1.529<br>(BA.1.15) | 2832  | A                                   | G   | SNP | Homozygous | orf1ab | QHD43415.1 | 1  | c.2567A>G                                  | p.Lys856Arg       | missense_variant            | MODE RATE | 0.987437 | 2824.53 | 476   | Patient 5_090122 |
| B.1.1.529<br>(BA.1.15) | 3037  | C                                   | T   | SNP | Homozygous | orf1ab | QHD43415.1 | 1  | c.2772C>T                                  | p.Phe924Phe       | synonymous_variant          | LOW       | 1.0      | 2939.9  | 1429  | Patient 5_090122 |

|                     |       |            |   |     |              |        |            |   |                           |                            |                             |           |          |         |     |                  |
|---------------------|-------|------------|---|-----|--------------|--------|------------|---|---------------------------|----------------------------|-----------------------------|-----------|----------|---------|-----|------------------|
| B.1.1.529 (BA.1.15) | 5386  | T          | G | SNP | Homozygous   | orf1ab | QHD43415.1 | 1 | c.5121T>G                 | p.Ala1707Ala               | synonymous_variant          | LOW       | 1.0      | 1857.1  | 249 | Patient 5_090122 |
| B.1.1.529 (BA.1.15) | 6512  | AGTT       | A | DEL | Homozygous   | orf1ab | QHD43415.1 | 1 | c.6248_6250delGTT         | p.Ser2083_Leu2084delinslle | disruptive_inframe_deletion | MODE RATE | 1.0      | 2949.42 | 435 | Patient 5_090122 |
| B.1.1.529 (BA.1.15) | 8393  | G          | A | SNP | Homozygous   | orf1ab | QHD43415.1 | 1 | c.8128G>A                 | p.Ala2710Thr               | missense_variant            | MODE RATE | 1.0      | 2856.51 | 385 | Patient 5_090122 |
| B.1.1.529 (BA.1.15) | 10029 | C          | T | SNP | Homozygous   | orf1ab | QHD43415.1 | 1 | c.9764C>T                 | p.Thr3255Ile               | missense_variant            | MODE RATE | 0.9975   | 2948.66 | 459 | Patient 5_090122 |
| B.1.1.529 (BA.1.15) | 10135 | T          | C | SNP | Homozygous   | orf1ab | QHD43415.1 | 1 | c.9870T>C                 | p.Leu3290Leu               | synonymous_variant          | LOW       | 1.0      | 2961.02 | 495 | Patient 5_090122 |
| B.1.1.529 (BA.1.15) | 10449 | C          | A | SNP | Homozygous   | orf1ab | QHD43415.1 | 1 | c.10184C>A                | p.Pro3395His               | missense_variant            | MODE RATE | 0.994638 | 2716.48 | 373 | Patient 5_090122 |
| B.1.1.529 (BA.1.15) | 11282 | AGTTTGTCTG | A | DEL | Homozygous   | orf1ab | QHD43415.1 | 1 | c.11022_11030delGTCTGGTTT | p.Leu3674_Gly3676del       | disruptive_inframe_deletion | MODE RATE | 1.0      | 1088.46 | 148 | Patient 5_090122 |
| B.1.1.529 (BA.1.15) | 11537 | A          | G | SNP | Homozygous   | orf1ab | QHD43415.1 | 1 | c.11272A>G                | p.Ile3758Val               | missense_variant            | MODE RATE | 1.0      | 801.253 | 108 | Patient 5_090122 |
| B.1.1.529 (BA.1.15) | 13195 | T          | C | SNP | Homozygous   | orf1ab | QHD43415.1 | 1 | c.12930T>C                | p.Val4310Val               | synonymous_variant          | LOW       | 1.0      | 2694.18 | 362 | Patient 5_090122 |
| B.1.1.529 (BA.1.15) | 14408 | C          | T | SNP | Homozygous   | orf1ab | QHD43415.1 | 2 | c.14144C>T                | p.Pro4715Leu               | missense_variant            | MODE RATE | 1.0      | 1040.26 | 140 | Patient 5_090122 |
| B.1.1.529 (BA.1.15) | 15240 | C          | T | SNP | Homozygous   | orf1ab | QHD43415.1 | 2 | c.14976C>T                | p.Asn4992Asn               | synonymous_variant          | LOW       | 1.0      | 2982.07 | 648 | Patient 5_090122 |
| B.1.1.529 (BA.1.15) | 17105 | AT         | A | DEL | Heterozygous | orf1ab | QHD43415.1 | 2 | c.16845delT               | p.Phe5615fs                | frameshift_variant          | HIGH      | 0.62766  | 194.205 | 284 | Patient 5_090122 |
| B.1.1.529 (BA.1.15) | 18163 | A          | G | SNP | Homozygous   | orf1ab | QHD43415.1 | 2 | c.17899A>G                | p.Ile5967Val               | missense_variant            | MODE RATE | 0.971751 | 1190.82 | 177 | Patient 5_090122 |

|                      |       |           |            |       |            |   |            |   |                             |                             |                                              |           |          |          |     |                  |  |
|----------------------|-------|-----------|------------|-------|------------|---|------------|---|-----------------------------|-----------------------------|----------------------------------------------|-----------|----------|----------|-----|------------------|--|
| )                    |       |           |            |       |            |   |            |   |                             |                             |                                              |           |          |          |     |                  |  |
| B.1.1.529 (BA.1.152) | 21762 | CTATACATG | TTA        | MIXED | Homozygous | S | QHD43416.1 | 1 | c.200_208delCTATACATGinsTTA | p.Ala67_Val70delinsValIle   | missense_variant&disruptive_inframe_deletion | MODE RATE | 1.0      | 211.414  | 28  | Patient 5_090122 |  |
| B.1.1.529 (BA.1.153) | 22193 | AATT      | A          | DEL   | Homozygous | S | QHD43416.1 | 1 | c.632_634delATT             | p.Asn211_Leu212delinsIle    | disruptive_inframe_deletion                  | MODE RATE | 1.0      | 153.1.22 | 207 | Patient 5_090122 |  |
| B.1.1.529 (BA.1.154) | 22204 | T         | TGAGCCAGAA | INS   | Homozygous | S | QHD43416.1 | 1 | c.644_645insGCCAGAAGAA      | p.Arg214_Asp215insGluProGlu | disruptive_inframe_insertion                 | MODE RATE | 0.868932 | 1014.47  | 207 | Patient 5_090122 |  |
| B.1.1.529 (BA.1.158) | 22578 | G         | A          | SNP   | Homozygous | S | QHD43416.1 | 1 | c.1016G>A                   | p.Gly339Asp                 | missense_variant                             | MODE RATE | 1.0      | 253.401  | 34  | Patient 5_090122 |  |
| B.1.1.529 (BA.1.153) | 22673 | TC        | CT         | MNP   | Homozygous | S | QHD43416.1 | 1 | c.1111_1112delTCinsCT       | p.Ser371Leu                 | missense_variant                             | MODE RATE | 1.0      | 510.853  | 69  | Patient 5_090122 |  |
| B.1.1.529 (BA.1.159) | 22679 | T         | C          | SNP   | Homozygous | S | QHD43416.1 | 1 | c.1117T>C                   | p.Ser373Pro                 | missense_variant                             | MODE RATE | 1.0      | 510.852  | 69  | Patient 5_090122 |  |
| B.1.1.529 (BA.1.156) | 22686 | C         | T          | SNP   | Homozygous | S | QHD43416.1 | 1 | c.1124C>T                   | p.Ser375Phe                 | missense_variant                             | MODE RATE | 1.0      | 385.613  | 51  | Patient 5_090122 |  |
| B.1.1.529 (BA.1.153) | 22813 | G         | T          | SNP   | Homozygous | S | QHD43416.1 | 1 | c.1251G>T                   | p.Lys417Asn                 | missense_variant                             | MODE RATE | 1.0      | 297.3.58 | 477 | Patient 5_090122 |  |
| B.1.1.529 (BA.1.152) | 22882 | T         | G          | SNP   | Homozygous | S | QHD43416.1 | 1 | c.1320T>G                   | p.Asn440Lys                 | missense_variant                             | MODE RATE | 0.997494 | 2940.74  | 984 | Patient 5_090122 |  |
| B.1.1.529 (BA.1.158) | 22898 | G         | A          | SNP   | Homozygous | S | QHD43416.1 | 1 | c.1336G>A                   | p.Gly446Ser                 | missense_variant                             | MODE RATE | 1.0      | 2947.71  | 997 | Patient 5_090122 |  |
| B.1.1.529 (BA.1.152) | 22992 | GCAC      | ACAA       | MNP   | Homozygous | S | QHD43416.1 | 1 | c.1430_1433delGCACinsACAA   | p.SerThr477AasnLys          | missense_variant                             | MODE RATE | 1.0      | 2942.72  | 590 | Patient 5_090122 |  |
| B.1.1.529 (BA.1.153) | 23013 | A         | C          | SNP   | Homozygous | S | QHD43416.1 | 1 | c.1451A>C                   | p.Glu484Ala                 | missense_variant                             | MODE RATE | 0.994987 | 2347.44  | 593 | Patient 5_090122 |  |

|                     |       |   |   |     |            |   |            |   |           |              |                    |           |          |         |      |                  |
|---------------------|-------|---|---|-----|------------|---|------------|---|-----------|--------------|--------------------|-----------|----------|---------|------|------------------|
| B.1.1.529 (BA.1.15) | 23040 | A | G | SNP | Homozygous | S | QHD43416.1 | 1 | c.1478A>G | p.Gln493Arg  | missense_variant   | MODE RATE | 1.0      | 2705.68 | 576  | Patient 5_090122 |
| B.1.1.529 (BA.1.15) | 23202 | C | A | SNP | Homozygous | S | QHD43416.1 | 1 | c.1640C>A | p.Thr547Lys  | missense_variant   | MODE RATE | 1.0      | 711.711 | 94   | Patient 5_090122 |
| B.1.1.529 (BA.1.15) | 23403 | A | G | SNP | Homozygous | S | QHD43416.1 | 1 | c.1841A>G | p.Asp614Gly  | missense_variant   | MODE RATE | 1.0      | 2980.45 | 423  | Patient 5_090122 |
| B.1.1.529 (BA.1.15) | 23525 | C | T | SNP | Homozygous | S | QHD43416.1 | 1 | c.1963C>T | p.His655Tyr  | missense_variant   | MODE RATE | 1.0      | 2981.96 | 401  | Patient 5_090122 |
| B.1.1.529 (BA.1.15) | 23599 | T | G | SNP | Homozygous | S | QHD43416.1 | 1 | c.2037T>G | p.Asn679Lys  | missense_variant   | MODE RATE | 1.0      | 2065.51 | 278  | Patient 5_090122 |
| B.1.1.529 (BA.1.15) | 23604 | C | A | SNP | Homozygous | S | QHD43416.1 | 1 | c.2042C>A | p.Pro681His  | missense_variant   | MODE RATE | 1.0      | 2045.23 | 275  | Patient 5_090122 |
| B.1.1.529 (BA.1.15) | 23854 | C | A | SNP | Homozygous | S | QHD43416.1 | 1 | c.2292C>A | p.Asn764Lys  | missense_variant   | MODE RATE | 1.0      | 2247.86 | 303  | Patient 5_090122 |
| B.1.1.529 (BA.1.15) | 23948 | G | T | SNP | Homozygous | S | QHD43416.1 | 1 | c.2386G>T | p.Asp796Tyr  | missense_variant   | MODE RATE | 1.0      | 674.512 | 91   | Patient 5_090122 |
| B.1.1.529 (BA.1.15) | 24130 | C | A | SNP | Homozygous | S | QHD43416.1 | 1 | c.2568C>A | p.Asn856Lys  | missense_variant   | MODE RATE | 1.0      | 1048.06 | 141  | Patient 5_090122 |
| B.1.1.529 (BA.1.15) | 24424 | A | T | SNP | Homozygous | S | QHD43416.1 | 1 | c.2862A>T | p.Gln954His  | missense_variant   | MODE RATE | 0.997494 | 2373.9  | 415  | Patient 5_090122 |
| B.1.1.529 (BA.1.15) | 24469 | T | A | SNP | Homozygous | S | QHD43416.1 | 1 | c.2907T>A | p.Asn969Lys  | missense_variant   | MODE RATE | 1.0      | 2978.87 | 1264 | Patient 5_090122 |
| B.1.1.529 (BA.1.15) | 24503 | C | T | SNP | Homozygous | S | QHD43416.1 | 1 | c.2941C>T | p.Leu981Phe  | missense_variant   | MODE RATE | 0.97995  | 2204.57 | 1289 | Patient 5_090122 |
| B.1.1.529 (BA.1.15) | 25000 | C | T | SNP | Homozygous | S | QHD43416.1 | 1 | c.3438C>T | p.Asp1146Asp | synonymous_variant | LOW       | 1.0      | 2982.13 | 527  | Patient 5_090122 |

|                     |       |            |     |     |            |       |            |    |                       |                   |                             |           |          |         |      |                 |  |
|---------------------|-------|------------|-----|-----|------------|-------|------------|----|-----------------------|-------------------|-----------------------------|-----------|----------|---------|------|-----------------|--|
| )                   |       |            |     |     |            |       |            |    |                       |                   |                             |           |          |         |      |                 |  |
| B.1.1.529 (BA.1.15) | 25584 | C          | T   | SNP | Homozygous | ORF3a | QHD43417.1 | 1  | c.192C>T              | p.Thr64Thr        | synonymous_variant          | LOW       | 0.984925 | 2800.48 | 622  | Patient5_090122 |  |
| B.1.1.529 (BA.1.15) | 25708 | C          | T   | SNP | Homozygous | ORF3a | QHD43417.1 | 1  | c.316C>T              | p.Leu106Phe       | missense_variant            | MODE RATE | 0.9975   | 2937.91 | 474  | Patient5_090122 |  |
| B.1.1.529 (BA.1.15) | 26270 | C          | T   | SNP | Homozygous | E     | QHD43418.1 | 1  | c.26C>T               | p.Thr9Ile         | missense_variant            | MODE RATE | 1.0      | 2982.16 | 3575 | Patient5_090122 |  |
| B.1.1.529 (BA.1.15) | 26530 | A          | G   | SNP | Homozygous | M     | QHD43419.1 | 1  | c.8A>G                | p.Asp3Gly         | missense_variant            | MODE RATE | 1.0      | 474.141 | 64   | Patient5_090122 |  |
| B.1.1.529 (BA.1.15) | 26709 | G          | A   | SNP | Homozygous | M     | QHD43419.1 | 1  | c.187G>A              | p.Ala63Thr        | missense_variant            | MODE RATE | 1.0      | 2974.78 | 454  | Patient5_090122 |  |
| B.1.1.529 (BA.1.15) | 27259 | A          | C   | SNP | Homozygous | ORF6  | QHD43420.1 | 1  | c.58A>C               | p.Arg20Arg        | synonymous_variant          | LOW       | 0.996845 | 2330.22 | 317  | Patient5_090122 |  |
| B.1.1.529 (BA.1.15) | 27807 | C          | T   | SNP | Homozygous | ORF8  | QHD43422.1 | -1 | c.-87C>T              | .                 | upstream_gene_variant       | MODIFIER  | 1.0      | 920.258 | 124  | Patient5_090122 |  |
| B.1.1.529 (BA.1.15) | 28271 | A          | T   | SNP | Homozygous | N     | QHD43423.2 | -1 | c.-3A>T               | .                 | upstream_gene_variant       | MODIFIER  | 0.9875   | 2768.04 | 2299 | Patient5_090122 |  |
| B.1.1.529 (BA.1.15) | 28311 | C          | T   | SNP | Homozygous | N     | QHD43423.2 | 1  | c.38C>T               | p.Pro13Leu        | missense_variant            | MODE RATE | 0.99     | 2301.98 | 2308 | Patient5_090122 |  |
| B.1.1.529 (BA.1.15) | 28361 | GGAGAACGCA | G   | DEL | Homozygous | N     | QHD43423.2 | 1  | c.90_98delAGAACGCAG   | p.Glu31_Ser33del  | disruptive_inframe_deletion | MODE RATE | 1.0      | 2921.2  | 766  | Patient5_090122 |  |
| B.1.1.529 (BA.1.15) | 28881 | GGG        | AAC | MNP | Homozygous | N     | QHD43423.2 | 1  | c.608_610delGGGinsAAC | p.ArgGly203LysArg | missense_variant            | MODE RATE | 0.992424 | 2861.8  | 641  | Patient5_090122 |  |
| B.1.1.529 (BA.1.15) | 29301 | A          | G   | SNP | Homozygous | N     | QHD43423.2 | 1  | c.1028A>G             | p.Asp343Gly       | missense_variant            | MODE RATE | 0.994382 | 1298.47 | 178  | Patient5_090122 |  |

|                        |       |   |   |     |            |   |                |   |           |             |                  |              |                 |                 |         |                         |
|------------------------|-------|---|---|-----|------------|---|----------------|---|-----------|-------------|------------------|--------------|-----------------|-----------------|---------|-------------------------|
| B.1.1.529<br>(BA.1.15) | 29421 | C | T | SNP | Homozygous | N | QHD434<br>23.2 | 1 | c.1148C>T | p.Pro383Leu | missense_variant | MODE<br>RATE | 0.9<br>956<br>9 | 169<br>8.0<br>7 | 23<br>2 | Patient<br>5_0901<br>22 |
|------------------------|-------|---|---|-----|------------|---|----------------|---|-----------|-------------|------------------|--------------|-----------------|-----------------|---------|-------------------------|

*Supplementary Table 2:* complete list of mutations identified in the SARS-CoV-2 genomes from patients described.
